# Supplementary material for: Billefjorden’s benthic biodiversity: the impact of glacier retreat on faunal communities in a high Arctic fjord
Source: Research Square preprint supplement (doi:10.21203/rs.3.rs-5656696/v1), 2025-04-29
Supplement: Supplementary file 1 [file 4f37de01d1de75674faae5e6.xlsx]

## Sheet: Meta_data
Caption	Billefjorden’s benthic biodiversity: the effects of river runoff and glacier influence on benthic community structures in Billefjorden, Svalbard; Polar Biology; Arjen A. W. van der Kamp, Victor Gonzalez Triginer, Arunima Sen; Department of Arctic Biology, University Centre in Svalbard, N-9171, Longyearbyen, Norway; aaw.vanderkamp@gmail.com
ESM_1	Benthic taxa abundance data from four different locations in Billefjorden. GLA = shore-terminating side of the Nordenskiöldbreen location, RIV = inland glacier location in Petuniabukta, MGL = marine-terminating side of the Nordenskiöldbreen location and CON = reference location in Scottvika. 20 and 60 m indicate the approximate water depth of a replicate sample. R1 and R2 represents replicate sam…

## Sheet: ESM_1
Grab	Nr	UUID	Parent UUID	Phylum	Class	Order	Family	Genus	Species	Full_Name	N	Wet_Weight (g)
GLA_20m_R1	1	68aad826/d48d/11ee/acf0/a0481c9e7d26	8d7f90b8+31d3+11ee+b719+a0481c9e7d26	Annelida	Polychaeta	Cossurida	Cossuridae	Cossura	longocirrata	Cossura longocirrata	15	0.0029
GLA_20m_R1	2	c91a66f8/f5bd/11ee/bddc/a0481c9e7d26	8d7f90b8+31d3+11ee+b719+a0481c9e7d26	Annelida	Polychaeta	Eunicida	Lumbrineridae	Abyssoninoe		Abyssoninoe sp.	31	0.0336
GLA_20m_R1	3	cd5d6c88/f5bd/11ee/bddc/a0481c9e7d26	8d7f90b8+31d3+11ee+b719+a0481c9e7d26	Annelida	Polychaeta	Eunicida	Lumbrineridae	Lumbrineris	mixochaeta	Lumbrineris mixochaeta	1	0.0001
GLA_20m_R1	4	8b2a17c2/d48d/11ee/acf0/a0481c9e7d26	8d7f90b8+31d3+11ee+b719+a0481c9e7d26	Annelida	Polychaeta	Phyllodocida	Nephtyidae	Aglaophamus	rubella	Aglaophamus rubella	1	0.0587
GLA_20m_R1	5	8591b8b0/d48d/11ee/acf0/a0481c9e7d26	8d7f90b8+31d3+11ee+b719+a0481c9e7d26	Annelida	Polychaeta	Phyllodocida	Nephtyidae	Nephtys	ciliata	Nephtys ciliata	3	0.1647
GLA_20m_R1	6	93809f68/d48d/11ee/acf0/a0481c9e7d26	8d7f90b8+31d3+11ee+b719+a0481c9e7d26	Annelida	Polychaeta	Phyllodocida	Nephtyidae			Nephtyidae	3	0.0018
GLA_20m_R1	7	e58e925c/fbf6/11ee/a2ac/a0481c9e7d26	8d7f90b8+31d3+11ee+b719+a0481c9e7d26	Annelida	Polychaeta	Phyllodocida	Phyllodocidae			Phyllodocidae	1	0.0091
GLA_20m_R1	8	99d03180/d48d/11ee/acf0/a0481c9e7d26	8d7f90b8+31d3+11ee+b719+a0481c9e7d26	Annelida	Polychaeta	Terebellida	Cirratulidae			Cirratulidae	118	0.0525
GLA_20m_R1	9	9f58b474/d48d/11ee/acf0/a0481c9e7d26	8d7f90b8+31d3+11ee+b719+a0481c9e7d26	Annelida	Polychaeta	Terebellida	Flabelligeridae	Brada	glanulosa	Brada glanulosa	2	0.0006
GLA_20m_R1	10	a9b14f80/d48d/11ee/acf0/a0481c9e7d26	8d7f90b8+31d3+11ee+b719+a0481c9e7d26	Annelida	Sipuncula	Golfingiida	Phascolionidae			Phascolionidae	2	0.0039
GLA_20m_R1	11	fffaf182/d64c/11ee/be26/a0481c9e7d26	8d7f90b8+31d3+11ee+b719+a0481c9e7d26	Arthropoda	Malacostraca	Cumacea	Nannastacidae	Campylaspis	rubicunda	Campylaspis rubicunda	1	0.0005
GLA_20m_R1	12	b7e49e7c/d48d/11ee/acf0/a0481c9e7d26	8d7f90b8+31d3+11ee+b719+a0481c9e7d26	Bryozoa	Gymnolaemata	Cheilostomatida	Flustridae	Securiflustra	securifrons	Securiflustra securifrons	2	0.0034
GLA_20m_R1	13	be32f3aa/d48d/11ee/acf0/a0481c9e7d26	8d7f90b8+31d3+11ee+b719+a0481c9e7d26	Echinodermata	Ophiuroidea	Ophiurida	Ophiuridae	Ophiocten	sericeum	Ophiocten sericeum	1	0.0635
GLA_20m_R1	14	c5b50398/d48d/11ee/acf0/a0481c9e7d26	8d7f90b8+31d3+11ee+b719+a0481c9e7d26	Echinodermata	Ophiuroidea	Ophiurida	Ophiuridae			Ophiuridae	1	0.0001
GLA_20m_R1	15	cd5a835c/d48d/11ee/acf0/a0481c9e7d26	8d7f90b8+31d3+11ee+b719+a0481c9e7d26	Mollusca	Bivalvia	Adapedonta	Hiatellidae	Hiatella	arctica	Hiatella arctica	11	24.3791
GLA_20m_R1	16	d6f988cc/d48d/11ee/acf0/a0481c9e7d26	8d7f90b8+31d3+11ee+b719+a0481c9e7d26	Mollusca	Bivalvia	Adapedonta	Hiatellidae	Panomya	norvegica	Panomya norvegica	5	14.1055
GLA_20m_R1	17	15fdcebe/d652/11ee/9fa8/a0481c9e7d26	8d7f90b8+31d3+11ee+b719+a0481c9e7d26	Mollusca	Bivalvia	Anomalodesmata	Cuspidariidae	Cuspidaria	obesa	Cuspidaria obesa	2	0.0094
GLA_20m_R1	18	55cbe8e2/f0eb/11ee/af79/a0481c9e7d26	8d7f90b8+31d3+11ee+b719+a0481c9e7d26	Mollusca	Bivalvia	Cardiida	Tellinidae	Macoma	calcarea	Macoma calcarea	17	1.9685
GLA_20m_R1	19	163f4956/d7d4/11ee/a214/a0481c9e7d26	8d7f90b8+31d3+11ee+b719+a0481c9e7d26	Mollusca	Bivalvia	Lucinida	Thyasiridae	Axinopsida	orbiculata	Axinopsida orbiculata	6	0.0687
GLA_20m_R1	20	1c303028/d7d4/11ee/a214/a0481c9e7d26	8d7f90b8+31d3+11ee+b719+a0481c9e7d26	Mollusca	Bivalvia	Lucinida	Thyasiridae	Thyasira	gouldi	Thyasira gouldi	3	0.0441
GLA_20m_R1	21	e697813a/d48d/11ee/acf0/a0481c9e7d26	8d7f90b8+31d3+11ee+b719+a0481c9e7d26	Mollusca	Bivalvia	Lucinida	Thyasiridae			Thyasiridae	10	0.0171
GLA_20m_R1	22	51169eaa/f0eb/11ee/af79/a0481c9e7d26	8d7f90b8+31d3+11ee+b719+a0481c9e7d26	Mollusca	Bivalvia	Myida	Myidae	Mya	truncata	Mya truncata	3	9.0885
GLA_20m_R1	23	5c9cec5c/f0eb/11ee/af79/a0481c9e7d26	8d7f90b8+31d3+11ee+b719+a0481c9e7d26	Mollusca	Bivalvia	Nuculanida	Yoldiidae	Yoldiella	solidula	Yoldiella solidula	7	0.0329
GLA_20m_R1	24	fb85d6f0/d48d/11ee/acf0/a0481c9e7d26	8d7f90b8+31d3+11ee+b719+a0481c9e7d26	Mollusca	Bivalvia	Nuculida	Nuculidae	Ennucula	tenuis	Ennucula tenuis	97	3.116
GLA_20m_R1	25	62564562/f0eb/11ee/af79/a0481c9e7d26	8d7f90b8+31d3+11ee+b719+a0481c9e7d26	Mollusca	Bivalvia	Nuculida	Nuculidae	Nuculana	pernula	Nuculana pernula	2	0.0046
GLA_20m_R1	26	02a3c8c0/d48e/11ee/acf0/a0481c9e7d26	8d7f90b8+31d3+11ee+b719+a0481c9e7d26	Mollusca	Caudofoveata	Chaetodermatida	Chaetodermatidae	Chaetoderma	nitidulum	Chaetoderma nitidulum	1	0.0038
GLA_20m_R1	27	07667470/d48e/11ee/acf0/a0481c9e7d26	8d7f90b8+31d3+11ee+b719+a0481c9e7d26	Mollusca	Gastropoda	Cephalaspidea	Retusidae	Retusa		Retusa sp.	2	0.0148
GLA_20m_R1	28	0ec6533e/d48e/11ee/acf0/a0481c9e7d26	8d7f90b8+31d3+11ee+b719+a0481c9e7d26	Mollusca	Gastropoda	Neogastropoda	Cancellariidae	Admete		Admete sp.	1	0.0012
GLA_20m_R1	29	13ed2c02/d48e/11ee/acf0/a0481c9e7d26	8d7f90b8+31d3+11ee+b719+a0481c9e7d26	Segments						Segments		1.2859
GLA_20m_R1	30	263e852c/183b/11ef/ab98/a0481c9e7d26	8d7f90b8+31d3+11ee+b719+a0481c9e7d26	Segments Echinodermata						Segments
GLA_20m_R2	1	fd9a6896/f807/11ee/a5cc/a0481c9e7d26	946d838a+31d3+11ee+b719+a0481c9e7d26	Annelida	Polychaeta	Cossurida	Cossuridae	Cossura	longocirrata	Cossura longocirrata	18	0.0039
GLA_20m_R2	2	ce20c1e0/d64d/11ee/be26/a0481c9e7d26	946d838a+31d3+11ee+b719+a0481c9e7d26	Annelida	Polychaeta	Eunicida	Lumbrineridae	Lumbrineris	mixochaeta	Lumbrineris mixochaeta	23	0.0159
GLA_20m_R2	3	792bf474/d491/11ee/a509/a0481c9e7d26	946d838a+31d3+11ee+b719+a0481c9e7d26	Annelida	Polychaeta	Phyllodocida	Lacydoniidae	Lacydonia		Lacydonia sp.	2	0.0017
GLA_20m_R2	4	832f1c26/d491/11ee/a509/a0481c9e7d26	946d838a+31d3+11ee+b719+a0481c9e7d26	Annelida	Polychaeta	Phyllodocida	Nephtyidae	Nephtys	ciliata	Nephtys ciliata	1	0.0539
GLA_20m_R2	5	88a413be/d491/11ee/a509/a0481c9e7d26	946d838a+31d3+11ee+b719+a0481c9e7d26	Annelida	Polychaeta	Phyllodocida	Nephtyidae			Nephtyidae	4	0.0021
GLA_20m_R2	6	7358f01a/d491/11ee/a509/a0481c9e7d26	946d838a+31d3+11ee+b719+a0481c9e7d26	Annelida	Polychaeta	Phyllodocida	Syllidae			Syllidae	1	0.0001
GLA_20m_R2	7	8e575172/d491/11ee/a509/a0481c9e7d26	946d838a+31d3+11ee+b719+a0481c9e7d26	Annelida	Polychaeta	Terebellida	Cirratulidae			Cirratulidae	29	0.0062
GLA_20m_R2	8	9490e59e/d491/11ee/a509/a0481c9e7d26	946d838a+31d3+11ee+b719+a0481c9e7d26	Chordata	Ascidiacea	Stolidobranchia	Styelidae	Styela	gelatinosa	Styela gelatinosa	1	1.2633
GLA_20m_R2	9	9954d07c/d491/11ee/a509/a0481c9e7d26	946d838a+31d3+11ee+b719+a0481c9e7d26	Mollusca	Bivalvia	Adapedonta	Hiatellidae	Hiatella	arctica	Hiatella arctica	10	24.2032
GLA_20m_R2	10	2e307e9a/f0e3/11ee/af79/a0481c9e7d26	946d838a+31d3+11ee+b719+a0481c9e7d26	Mollusca	Bivalvia	Cardiida	Tellinidae	Macoma	calcarea	Macoma calcarea	14	1.7536
GLA_20m_R2	11	2e307e9a/f0e3/11ee/af79/a0481c9e7d26	946d838a+31d3+11ee+b719+a0481c9e7d26	Mollusca	Bivalvia	Myida	Myidae	Mya	truncata	Mya truncata	5	10.2339
GLA_20m_R2	12	9caa64c6/d491/11ee/a509/a0481c9e7d26	946d838a+31d3+11ee+b719+a0481c9e7d26	Mollusca	Bivalvia	Nuculida	Nuculidae	Ennucula	tenuis	Ennucula tenuis	36	0.8373
GLA_20m_R2	13	ae222e14/d491/11ee/a509/a0481c9e7d26	946d838a+31d3+11ee+b719+a0481c9e7d26	Mollusca	Caudofoveata	Chaetodermatida	Chaetodermatidae	Chaetoderma	nitidulum	Chaetoderma nitidulum	2	0.0172
GLA_20m_R2	14	c5b645ba/d491/11ee/a509/a0481c9e7d26	946d838a+31d3+11ee+b719+a0481c9e7d26	Mollusca	Gastropoda	Neogastropoda	Buccinidae	Volutopsius	norwegicus	Volutopsius norwegicus	1	0.0271
GLA_20m_R2	15	3626cde8/f0e3/11ee/af79/a0481c9e7d26	946d838a+31d3+11ee+b719+a0481c9e7d26	Nemertea						Nemertea	2	0.0054
GLA_20m_R2	16	ca50aa34/d491/11ee/a509/a0481c9e7d26	946d838a+31d3+11ee+b719+a0481c9e7d26	Segments						Segments		0.0721
GLA_60m_R1	1	0dbffd8a/f808/11ee/a5cc/a0481c9e7d26	b3259cea+31d3+11ee+b719+a0481c9e7d26	Annelida	Polychaeta	Eunicida	Lumbrineridae	Lumbrineris	mixochaeta	Lumbrineris mixochaeta	9	0.2832
GLA_60m_R1	2	1e6d72e0/d63c/11ee/be26/a0481c9e7d26	b3259cea+31d3+11ee+b719+a0481c9e7d26	Annelida	Polychaeta	Terebellida	Cirratulidae			Cirratulidae	83	0.1436
GLA_60m_R1	3	1e6d72e0/d63c/11ee/be26/a0481c9e7d26	b3259cea+31d3+11ee+b719+a0481c9e7d26	Arthropoda	Malacostraca	Cumacea	Nannastacidae	Campylaspis	rubicunda	Campylaspis rubicunda	2	0.0071
GLA_60m_R1	4	90e6ac1a/dc90/11ee/8c70/a0481c9e7d26	b3259cea+31d3+11ee+b719+a0481c9e7d26	Echinodermata	Echinoidea	Camarodonta	Echinidae	Echinus	esculentus	Echinus esculentus	2	0.0033
GLA_60m_R1	5	2a6a208e/d63c/11ee/be26/a0481c9e7d26	b3259cea+31d3+11ee+b719+a0481c9e7d26	Echinodermata	Ophiuroidea	Ophiurida	Ophiuridae	Ophiura	sarsii	Ophiura sarsii	1	0.4325
GLA_60m_R1	6	3030ec00/d63c/11ee/be26/a0481c9e7d26	b3259cea+31d3+11ee+b719+a0481c9e7d26	Mollusca	Bivalvia	Anomalodesmata	Cuspidariidae	Cuspidaria	obesa	Cuspidaria obesa	7	0.0158
GLA_60m_R1	7	4862c718/f0f3/11ee/af79/a0481c9e7d26	b3259cea+31d3+11ee+b719+a0481c9e7d26	Mollusca	Bivalvia	Cardiida	Tellinidae	Macoma	calcarea	Macoma calcarea	15	1.1058
GLA_60m_R1	8	39c76b54/d63c/11ee/be26/a0481c9e7d26	b3259cea+31d3+11ee+b719+a0481c9e7d26	Mollusca	Bivalvia	Lucinida	Thyasiridae	Axinopsida	orbiculata	Axinopsida orbiculata	11	0.0922
GLA_60m_R1	9	425fe05c/d63c/11ee/be26/a0481c9e7d26	b3259cea+31d3+11ee+b719+a0481c9e7d26	Mollusca	Bivalvia	Lucinida	Thyasiridae	Mendicula	ferruginosa	Mendicula ferruginosa	4	0.0152
GLA_60m_R1	10	54c35f76/d63c/11ee/be26/a0481c9e7d26	b3259cea+31d3+11ee+b719+a0481c9e7d26	Mollusca	Bivalvia	Lucinida	Thyasiridae	Thyasira	gouldi	Thyasira gouldi	26	0.2492
GLA_60m_R1	11	3505ed84/d63c/11ee/be26/a0481c9e7d26	b3259cea+31d3+11ee+b719+a0481c9e7d26	Mollusca	Bivalvia	Lucinida	Thyasiridae			Thyasiridae	29	0.0881
GLA_60m_R1	12	591a98c8/d63c/11ee/be26/a0481c9e7d26	b3259cea+31d3+11ee+b719+a0481c9e7d26	Mollusca	Bivalvia	Mytilida	Mytilidae	Dacrydium	vitreum	Dacrydium vitreum	8	0.0299
GLA_60m_R1	13	3dcf7b52/f0f3/11ee/af79/a0481c9e7d26	b3259cea+31d3+11ee+b719+a0481c9e7d26	Mollusca	Bivalvia	Nuculanida	Yoldiidae	Yoldiella	lucida	Yoldiella lucida	2	0.0045
GLA_60m_R1	14	3dcf7b52/f0f3/11ee/af79/a0481c9e7d26	b3259cea+31d3+11ee+b719+a0481c9e7d26	Mollusca	Bivalvia	Nuculanida	Yoldiidae	Yoldiella	propinqua	Yoldiella propinqua	15	0.0219
GLA_60m_R1	15	4444ef1c/f0f3/11ee/af79/a0481c9e7d26	b3259cea+31d3+11ee+b719+a0481c9e7d26	Mollusca	Bivalvia	Nuculanida	Yoldiidae	Yoldiella	solidula	Yoldiella solidula	17	0.0759
GLA_60m_R1	16	6f71297a/d63c/11ee/be26/a0481c9e7d26	b3259cea+31d3+11ee+b719+a0481c9e7d26	Mollusca	Bivalvia	Nuculida	Nuculidae	Ennucula	tenuis	Ennucula tenuis	68	0.8722
GLA_60m_R1	17	7366ae88/d63c/11ee/be26/a0481c9e7d26	b3259cea+31d3+11ee+b719+a0481c9e7d26	Mollusca	Bivalvia	Nuculida	Nuculidae	Nuculana	pernula	Nuculana pernula	5	0.0135
GLA_60m_R1	18	78122d04/d63c/11ee/be26/a0481c9e7d26	b3259cea+31d3+11ee+b719+a0481c9e7d26	Mollusca	Caudofoveata	Chaetodermatida	Chaetodermatidae	Chaetoderma	nitidulum	Chaetoderma nitidulum	2	0.00595
GLA_60m_R1	19	7e56c472/d63c/11ee/be26/a0481c9e7d26	b3259cea+31d3+11ee+b719+a0481c9e7d26	Mollusca	Gastropoda	Littorinimorpha	Naticidae	Euspira	pallida	Euspira pallida	1	0.0185
GLA_60m_R1	20	7e56c472/d63c/11ee/be26/a0481c9e7d26	b3259cea+31d3+11ee+b719+a0481c9e7d26	Priapulida		Priapulomorpha	Priapulidae	Priapulus	caudatus	Priapulus caudatus	3	0.0912
GLA_60m_R1	21	88a32970/d63c/11ee/be26/a0481c9e7d26	b3259cea+31d3+11ee+b719+a0481c9e7d26	Segments						Segments		0.2109
GLA_60m_R2	1	81e6fd6c/daf8/11ee/a0b7/a0481c9e7d26	b3259ceb+31d3+11ee+b719+a0481c9e7d26	Annelida	Polychaeta	Cossurida	Cossuridae	Cossura	longocirrata	Cossura longocirrata	1	0.0001
GLA_60m_R2	2	16671c34/f808/11ee/a5cc/a0481c9e7d26	b3259ceb+31d3+11ee+b719+a0481c9e7d26	Annelida	Polychaeta	Eunicida	Lumbrineridae	Abyssoninoe		Abyssoninoe sp.	1	0.0019
GLA_60m_R2	3	1aef29d6/f808/11ee/a5cc/a0481c9e7d26	b3259ceb+31d3+11ee+b719+a0481c9e7d26	Annelida	Polychaeta	Eunicida	Lumbrineridae	Lumbrineris	mixochaeta	Lumbrineris mixochaeta	4	0.0005
GLA_60m_R2	4	8a1d0c88/daf8/11ee/a0b7/a0481c9e7d26	b3259ceb+31d3+11ee+b719+a0481c9e7d26	Annelida	Polychaeta	Terebellida	Cirratulidae			Cirratulidae	128	0.2026
GLA_60m_R2	5	8eb4fe72/daf8/11ee/a0b7/a0481c9e7d26	b3259ceb+31d3+11ee+b719+a0481c9e7d26	Arthropoda	Malacostraca	Cumacea	Nannastacidae	Campylaspis	rubicunda	Campylaspis rubicunda	1	0.0016
GLA_60m_R2	6	9e217f68/dc90/11ee/8c70/a0481c9e7d26	b3259ceb+31d3+11ee+b719+a0481c9e7d26	Echinodermata	Echinoidea	Camarodonta	Echinidae	Echinus	esculentus	Echinus esculentus	1	0.0022
GLA_60m_R2	7	9306195c/daf8/11ee/a0b7/a0481c9e7d26	b3259ceb+31d3+11ee+b719+a0481c9e7d26	Mollusca	Bivalvia	Anomalodesmata	Cuspidariidae	Cuspidaria	obesa	Cuspidaria obesa	2	0.0009
GLA_60m_R2	8	7db68b4c/f0f9/11ee/af79/a0481c9e7d26	b3259ceb+31d3+11ee+b719+a0481c9e7d26	Mollusca	Bivalvia	Cardiida	Tellinidae	Macoma	calcarea	Macoma calcarea	20	1.0901
GLA_60m_R2	9	9af60ff0/daf8/11ee/a0b7/a0481c9e7d26	b3259ceb+31d3+11ee+b719+a0481c9e7d26	Mollusca	Bivalvia	Lucinida	Thyasiridae	Axinopsida	orbiculata	Axinopsida orbiculata	19	0.1665
GLA_60m_R2	10	9f215c38/daf8/11ee/a0b7/a0481c9e7d26	b3259ceb+31d3+11ee+b719+a0481c9e7d26	Mollusca	Bivalvia	Lucinida	Thyasiridae	Mendicula	ferruginosa	Mendicula ferruginosa	11	0.0409
GLA_60m_R2	11	a4755cde/daf8/11ee/a0b7/a0481c9e7d26	b3259ceb+31d3+11ee+b719+a0481c9e7d26	Mollusca	Bivalvia	Lucinida	Thyasiridae	Thyasira	gouldi	Thyasira gouldi	10	0.1198
GLA_60m_R2	12	96f1df92/daf8/11ee/a0b7/a0481c9e7d26	b3259ceb+31d3+11ee+b719+a0481c9e7d26	Mollusca	Bivalvia	Lucinida	Thyasiridae			Thyasiridae	22	0.0578
GLA_60m_R2	13	af39781c/daf8/11ee/a0b7/a0481c9e7d26	b3259ceb+31d3+11ee+b719+a0481c9e7d26	Mollusca	Bivalvia	Mytilida	Mytilidae	Dacrydium	vitreum	Dacrydium vitreum	2	0.0014
GLA_60m_R2	14	7db68b4c/f0f9/11ee/af79/a0481c9e7d26	b3259ceb+31d3+11ee+b719+a0481c9e7d26	Mollusca	Bivalvia	Nuculanida	Yoldiidae	Yoldia	hyperborea	Yoldia hyperborea	1	0.3407
GLA_60m_R2	15	73f1a538/f0f9/11ee/af79/a0481c9e7d26	b3259ceb+31d3+11ee+b719+a0481c9e7d26	Mollusca	Bivalvia	Nuculanida	Yoldiidae	Yoldiella	frigida	Yoldiella frigida	1	0.0088
GLA_60m_R2	16	70e90002/f0f9/11ee/af79/a0481c9e7d26	b3259ceb+31d3+11ee+b719+a0481c9e7d26	Mollusca	Bivalvia	Nuculanida	Yoldiidae	Yoldiella	lucida	Yoldiella lucida	1	0.0016
GLA_60m_R2	17	73f1a538/f0f9/11ee/af79/a0481c9e7d26	b3259ceb+31d3+11ee+b719+a0481c9e7d26	Mollusca	Bivalvia	Nuculanida	Yoldiidae	Yoldiella	propinqua	Yoldiella propinqua	33	0.0665
GLA_60m_R2	18	6e0b0948/f0f9/11ee/af79/a0481c9e7d26	b3259ceb+31d3+11ee+b719+a0481c9e7d26	Mollusca	Bivalvia	Nuculanida	Yoldiidae	Yoldiella	solidula	Yoldiella solidula	14	0.0756
GLA_60m_R2	19	beca02f6/daf8/11ee/a0b7/a0481c9e7d26	b3259ceb+31d3+11ee+b719+a0481c9e7d26	Mollusca	Bivalvia	Nuculida	Nuculidae	Ennucula	tenuis	Ennucula tenuis	80	1.8657
GLA_60m_R2	20	c3758096/daf8/11ee/a0b7/a0481c9e7d26	b3259ceb+31d3+11ee+b719+a0481c9e7d26	Mollusca	Bivalvia	Nuculida	Nuculidae	Nuculana	pernula	Nuculana pernula	3	0.0246
GLA_60m_R2	21	ca7620da/daf8/11ee/a0b7/a0481c9e7d26	b3259ceb+31d3+11ee+b719+a0481c9e7d26	Mollusca	Caudofoveata	Chaetodermatida	Chaetodermatidae	Chaetoderma	nitidulum	Chaetoderma nitidulum	1	0.0076
GLA_60m_R2	22	ce88f94a/daf8/11ee/a0b7/a0481c9e7d26	b3259ceb+31d3+11ee+b719+a0481c9e7d26	Priapulida		Priapulomorpha	Priapulidae	Priapulus	caudatus	Priapulus caudatus	1	0.0423
GLA_60m_R2	23	d1e7175c/daf8/11ee/a0b7/a0481c9e7d26	b3259ceb+31d3+11ee+b719+a0481c9e7d26	Segments						Segments		0.0957
CON_20m_R1	1	42541aaa/d494/11ee/a509/a0481c9e7d26	cde966ec+31d3+11ee+b719+a0481c9e7d26	Annelida	Polychaeta	Cossurida	Cossuridae	Cossura	longocirrata	Cossura longocirrata	3	0.0001
CON_20m_R1	2	4ffc3034/d494/11ee/a509/a0481c9e7d26	cde966ec+31d3+11ee+b719+a0481c9e7d26	Annelida	Polychaeta	Eunicida	Dorvilleidae	Dorvillea		Dorvillea	3	0.0039
CON_20m_R1	3	9c40a59c/f802/11ee/a5cc/a0481c9e7d26	cde966ec+31d3+11ee+b719+a0481c9e7d26	Annelida	Polychaeta	Eunicida	Lumbrineridae	Abyssoninoe		Abyssoninoe sp.	3	1.0736
CON_20m_R1	4	a4764960/f802/11ee/a5cc/a0481c9e7d26	cde966ec+31d3+11ee+b719+a0481c9e7d26	Annelida	Polychaeta	Eunicida	Lumbrineridae	Lumbrineris	mixochaeta	Lumbrineris mixochaeta	17	0.0025
CON_20m_R1	5	7fae555a/d494/11ee/a509/a0481c9e7d26	cde966ec+31d3+11ee+b719+a0481c9e7d26	Annelida	Polychaeta	Phyllodocida	Nephtyidae	Aglaophamus	rubella	Aglaophamus rubella	1	0.0434
CON_20m_R1	6	839c85a6/d494/11ee/a509/a0481c9e7d26	cde966ec+31d3+11ee+b719+a0481c9e7d26	Annelida	Polychaeta	Phyllodocida	Nephtyidae	Nephtys	ciliata	Nephtys ciliata	4	1.8088
CON_20m_R1	7	87ea044e/d494/11ee/a509/a0481c9e7d26	cde966ec+31d3+11ee+b719+a0481c9e7d26	Annelida	Polychaeta	Phyllodocida	Nephtyidae			Nephtyidae	4	0.0018
CON_20m_R1	8	65d15a56/d494/11ee/a509/a0481c9e7d26	cde966ec+31d3+11ee+b719+a0481c9e7d26	Annelida	Polychaeta	Phyllodocida	Phyllodocidae			Phyllodocidae	1	0.0001
CON_20m_R1	9	79501f04/d494/11ee/a509/a0481c9e7d26	cde966ec+31d3+11ee+b719+a0481c9e7d26	Annelida	Polychaeta	Phyllodocida	Polynoidae			Polynoidae	2	0.0047
CON_20m_R1	10	6b4b37fe/d494/11ee/a509/a0481c9e7d26	cde966ec+31d3+11ee+b719+a0481c9e7d26	Annelida	Polychaeta	Phyllodocida	Polyodontidae			Polyodontidae	4	0.0085
CON_20m_R1	11	8d8aed0a/d494/11ee/a509/a0481c9e7d26	cde966ec+31d3+11ee+b719+a0481c9e7d26	Annelida	Polychaeta	Terebellida	Cirratulidae			Cirratulidae	184	0.1678
CON_20m_R1	12	235793ac/d494/11ee/a509/a0481c9e7d26	cde966ec+31d3+11ee+b719+a0481c9e7d26	Annelida	Polychaeta		Maldanidae	Euclymeninae		Euclymeninae sp.	1	0.0072
CON_20m_R1	13	2c0af23c/d494/11ee/a509/a0481c9e7d26	cde966ec+31d3+11ee+b719+a0481c9e7d26	Annelida	Polychaeta		Maldanidae	Isocrimus	planiceps	Isocrimus planiceps	1	0.0048
CON_20m_R1	14	34777828/d494/11ee/a509/a0481c9e7d26	cde966ec+31d3+11ee+b719+a0481c9e7d26	Annelida	Polychaeta		Maldanidae	Maldane		Maldane sp.	11	0.1827
CON_20m_R1	15	39d2d524/d494/11ee/a509/a0481c9e7d26	cde966ec+31d3+11ee+b719+a0481c9e7d26	Annelida	Polychaeta		Maldanidae	Praxillella	praetermissa	Praxillella praetermissa	2	0.0019
CON_20m_R1	16	39d2d524/d494/11ee/a509/a0481c9e7d26	cde966ec+31d3+11ee+b719+a0481c9e7d26	Annelida	Polychaeta		Maldanidae			Maldanidae	13	0.1468
CON_20m_R1	17	235793ac/d494/11ee/a509/a0481c9e7d26	cde966ec+31d3+11ee+b719+a0481c9e7d26	Annelida	Polychaeta		Oweniidae			Oweniidae	3	0.0053
CON_20m_R1	18	5a6240d6/d494/11ee/a509/a0481c9e7d26	cde966ec+31d3+11ee+b719+a0481c9e7d26	Annelida	Polychaeta		Scalibregmatidae			Scalibregmatidae	1	0.0001
CON_20m_R1	19	8cc24f8e/d64d/11ee/be26/a0481c9e7d26	cde966ec+31d3+11ee+b719+a0481c9e7d26	Arthropoda	Malacostraca	Cumacea	Diastylidae	Leptostylis	villosa	Leptostylis villosa	2	0.0005
CON_20m_R1	20	531e21e0/d64d/11ee/be26/a0481c9e7d26	cde966ec+31d3+11ee+b719+a0481c9e7d26	Arthropoda	Malacostraca	Cumacea	Nannastacidae	Campylaspis	rubicunda	Campylaspis rubicunda	1	0.0002
CON_20m_R1	21	a485294e/d494/11ee/a509/a0481c9e7d26	cde966ec+31d3+11ee+b719+a0481c9e7d26	Arthropoda	Malacostraca	Decapoda	Paguridae	Pagurus		Pagurus sp.	1	0.0001
CON_20m_R1	22	abab9e92/d494/11ee/a509/a0481c9e7d26	cde966ec+31d3+11ee+b719+a0481c9e7d26	Bryozoa	Gymnolaemata	Cheilostomatida	Flustridae	Securiflustra	securifrons	Securiflustra securifrons	1	0.0244
CON_20m_R1	23	b01527c8/d494/11ee/a509/a0481c9e7d26	cde966ec+31d3+11ee+b719+a0481c9e7d26	Chordata	Ascidiacea					Ascidiacea	2	1.0244
CON_20m_R1	24	bb07b2d6/d494/11ee/a509/a0481c9e7d26	cde966ec+31d3+11ee+b719+a0481c9e7d26	Echinodermata	Ophiuroidea	Ophiurida	Ophiuridae	Ophiura	robusta	Ophiura robusta	8	2.0244
CON_20m_R1	25	be599bfc/d494/11ee/a509/a0481c9e7d26	cde966ec+31d3+11ee+b719+a0481c9e7d26	Mollusca	Bivalvia	Adapedonta	Hiatellidae	Hiatella	arctica	Hiatella arctica	3	1.4379
CON_20m_R1	26	cb818010/d494/11ee/a509/a0481c9e7d26	cde966ec+31d3+11ee+b719+a0481c9e7d26	Mollusca	Bivalvia	Cardiida	Cardiidae	Ciliatocardium	ciliatum	Ciliatocardium ciliatum	1	3.9583
CON_20m_R1	27	00152334/f19d/11ee/af79/a0481c9e7d26	cde966ec+31d3+11ee+b719+a0481c9e7d26	Mollusca	Bivalvia	Cardiida	Tellinidae	Macoma	calcarea	Macoma calcarea	8	0.7451
CON_20m_R1	28	d4423f00/d494/11ee/a509/a0481c9e7d26	cde966ec+31d3+11ee+b719+a0481c9e7d26	Mollusca	Bivalvia	Carditida	Astartidae	Tridonta	montagui	Tridonta montagui	10	1.2462
CON_20m_R1	29	0d447cfc/d7e5/11ee/a214/a0481c9e7d26	cde966ec+31d3+11ee+b719+a0481c9e7d26	Mollusca	Bivalvia	Lucinida	Thyasiridae	Axinopsida	orbiculata	Axinopsida orbiculata	21	0.2352
CON_20m_R1	30	14b92064/d7e5/11ee/a214/a0481c9e7d26	cde966ec+31d3+11ee+b719+a0481c9e7d26	Mollusca	Bivalvia	Lucinida	Thyasiridae	Mendicula	ferruginosa	Mendicula ferruginosa	3	0.0046
CON_20m_R1	31	186f2cb2/d7e5/11ee/a214/a0481c9e7d26	cde966ec+31d3+11ee+b719+a0481c9e7d26	Mollusca	Bivalvia	Lucinida	Thyasiridae	Thyasira	gouldi	Thyasira gouldi	18	0.1645
CON_20m_R1	32	dae617be/d494/11ee/a509/a0481c9e7d26	cde966ec+31d3+11ee+b719+a0481c9e7d26	Mollusca	Bivalvia	Lucinida	Thyasiridae			Thyasiridae	5	0.0241
CON_20m_R1	33	0416f49e/f19d/11ee/af79/a0481c9e7d26	cde966ec+31d3+11ee+b719+a0481c9e7d26	Mollusca	Bivalvia	Myida	Myidae	Mya	truncata	Mya truncata	3	1.9553
CON_20m_R1	34	f3265948/d641/11ee/be26/a0481c9e7d26	cde966ec+31d3+11ee+b719+a0481c9e7d26	Mollusca	Bivalvia	Mytilida	Mytilidae	Dacrydium	vitreum	Dacrydium vitreum	4	0.0107
CON_20m_R1	35	0802bc78/f19d/11ee/af79/a0481c9e7d26	cde966ec+31d3+11ee+b719+a0481c9e7d26	Mollusca	Bivalvia	Nuculanida	Yoldiidae	Yoldiella	lucida	Yoldiella lucida	3	0.0156
CON_20m_R1	36	0802bc78/f19d/11ee/af79/a0481c9e7d26	cde966ec+31d3+11ee+b719+a0481c9e7d26	Mollusca	Bivalvia	Nuculanida	Yoldiidae	Yoldiella	solidula	Yoldiella solidula	37	0.0713
CON_20m_R1	37	ee9a9bfe/d494/11ee/a509/a0481c9e7d26	cde966ec+31d3+11ee+b719+a0481c9e7d26	Mollusca	Bivalvia	Nuculida	Nuculidae	Ennucula	tenuis	Ennucula tenuis	36	1.2738
CON_20m_R1	38	c120e5d0/d646/11ee/be26/a0481c9e7d26	cde966ec+31d3+11ee+b719+a0481c9e7d26	Mollusca	Bivalvia	Nuculida	Nuculidae	Nuculana	pernula	Nuculana pernula	14	0.2301
CON_20m_R1	39	067ccec2/d495/11ee/a509/a0481c9e7d26	cde966ec+31d3+11ee+b719+a0481c9e7d26	Mollusca	Caudofoveata	Chaetodermatida	Chaetodermatidae	Chaetoderma	nitidulum	Chaetoderma nitidulum	12	0.0519
CON_20m_R1	40	f733114c/d494/11ee/a509/a0481c9e7d26	cde966ec+31d3+11ee+b719+a0481c9e7d26	Mollusca	Gastropoda	Neogastropoda	Cancellariidae	Admete		Admete sp.	1	0.001
CON_20m_R1	41	fcf76c22/d494/11ee/a509/a0481c9e7d26	cde966ec+31d3+11ee+b719+a0481c9e7d26	Mollusca	Gastropoda	Trochida	Margaritidae	Margarites	costalis	Margarites costalis	2	0.0228
CON_20m_R1	42	0233032c/d495/11ee/a509/a0481c9e7d26	cde966ec+31d3+11ee+b719+a0481c9e7d26	Mollusca	Gastropoda		Lepetidae	Lepeta	caeca	Lepeta caeca	1	0.0445
CON_20m_R1	43	9699e298/d494/11ee/a509/a0481c9e7d26	cde966ec+31d3+11ee+b719+a0481c9e7d26	Nemertea						Nemertea	1	0.0002
CON_20m_R1	44	0e5bb2ca/d495/11ee/a509/a0481c9e7d26	cde966ec+31d3+11ee+b719+a0481c9e7d26	Segments						Segments		0.7722
CON_20m_R2	1	247ec208/d4be/11ee/be26/a0481c9e7d26	cde966ed+31d3+11ee+b719+a0481c9e7d26	Annelida	Polychaeta	Cossurida	Cossuridae	Cossura	longocirrata	Cossura longocirrata	13	0.0036
CON_20m_R2	2	aa8c72de/f802/11ee/a5cc/a0481c9e7d26	cde966ed+31d3+11ee+b719+a0481c9e7d26	Annelida	Polychaeta	Eunicida	Lumbrineridae	Abyssoninoe		Abyssoninoe sp.	6	0.0021
CON_20m_R2	3	ad741e98/f802/11ee/a5cc/a0481c9e7d26	cde966ed+31d3+11ee+b719+a0481c9e7d26	Annelida	Polychaeta	Eunicida	Lumbrineridae	Lumbrineris	mixochaeta	Lumbrineris mixochaeta	35	0.0201
CON_20m_R2	4	b15d6870/f802/11ee/a5cc/a0481c9e7d26	cde966ed+31d3+11ee+b719+a0481c9e7d26	Annelida	Polychaeta	Phyllodocida	Goniadidae			Goniadidae	2	0.0053
CON_20m_R2	5	363879da/d4be/11ee/be26/a0481c9e7d26	cde966ed+31d3+11ee+b719+a0481c9e7d26	Annelida	Polychaeta	Phyllodocida	Nephtyidae	Aglaophamus	rubella	Aglaophamus rubella	2	0.1999
CON_20m_R2	6	39f8513a/d4be/11ee/be26/a0481c9e7d26	cde966ed+31d3+11ee+b719+a0481c9e7d26	Annelida	Polychaeta	Phyllodocida	Nephtyidae	Nephtys	ciliata	Nephtys ciliata	8	0.8852
CON_20m_R2	7	423dbec0/d4be/11ee/be26/a0481c9e7d26	cde966ed+31d3+11ee+b719+a0481c9e7d26	Annelida	Polychaeta	Phyllodocida	Nephtyidae			Nephtyidae	2	0.0032
CON_20m_R2	8	2c9f8d32/d4be/11ee/be26/a0481c9e7d26	cde966ed+31d3+11ee+b719+a0481c9e7d26	Annelida	Polychaeta	Phyllodocida	Polynoidae			Polynoidae	2	0.0102
CON_20m_R2	9	fba2b69a/fbf6/11ee/a2ac/a0481c9e7d26	cde966ed+31d3+11ee+b719+a0481c9e7d26	Annelida	Polychaeta	Phyllodocida	Syllidae	Syllis	cornuta	Syllis cornuta	1	0.0047
CON_20m_R2	10	481331ea/d4be/11ee/be26/a0481c9e7d26	cde966ed+31d3+11ee+b719+a0481c9e7d26	Annelida	Polychaeta	Terebellida	Ampharetidae			Ampharetidae	1	0.0025
CON_20m_R2	11	4d058054/d4be/11ee/be26/a0481c9e7d26	cde966ed+31d3+11ee+b719+a0481c9e7d26	Annelida	Polychaeta	Terebellida	Cirratulidae			Cirratulidae	148	0.2638
CON_20m_R2	12	131946c8/d4be/11ee/be26/a0481c9e7d26	cde966ed+31d3+11ee+b719+a0481c9e7d26	Annelida	Polychaeta		Maldanidae	Euclymene	droebachiensis	Euclymene droebachiensis	1	0.0113
CON_20m_R2	13	17cc1646/d4be/11ee/be26/a0481c9e7d26	cde966ed+31d3+11ee+b719+a0481c9e7d26	Annelida	Polychaeta		Maldanidae	Maldane		Maldane sp.	3	0.0306
CON_20m_R2	14	1c80210a/d4be/11ee/be26/a0481c9e7d26	cde966ed+31d3+11ee+b719+a0481c9e7d26	Annelida	Polychaeta		Maldanidae	Praxillella	praetermissa	Praxillella praetermissa	1	0.0001
CON_20m_R2	15	2065d49a/d4be/11ee/be26/a0481c9e7d26	cde966ed+31d3+11ee+b719+a0481c9e7d26	Annelida	Polychaeta		Maldanidae			Maldanidae	4	0.0255
CON_20m_R2	16	e711bfce/d4bd/11ee/be26/a0481c9e7d26	cde966ed+31d3+11ee+b719+a0481c9e7d26	Annelida	Polychaeta		Oweniidae			Oweniidae	1	0.0047
CON_20m_R2	17	5281d500/d4be/11ee/be26/a0481c9e7d26	cde966ed+31d3+11ee+b719+a0481c9e7d26	Bryozoa	Gymnolaemata	Cheilostomatida	Flustridae	Securiflustra	securifrons	Securiflustra securifrons	8	0.3127
CON_20m_R2	18	3c76a4f0/f1ad/11ee/af79/a0481c9e7d26	cde966ed+31d3+11ee+b719+a0481c9e7d26	Echinodermata	Ophiuroidea	Ophiurida	Ophiuridae	Ophiura	robusta	Ophiura robusta	1	0.0025
CON_20m_R2	19	5ca3857e/d4be/11ee/be26/a0481c9e7d26	cde966ed+31d3+11ee+b719+a0481c9e7d26	Mollusca	Bivalvia	Adapedonta	Hiatellidae	Hiatella	arctica	Hiatella arctica	2	5.4253
CON_20m_R2	20	7c055640/d4be/11ee/be26/a0481c9e7d26	cde966ed+31d3+11ee+b719+a0481c9e7d26	Mollusca	Bivalvia	Adapedonta	Hiatellidae	Panomya	norvegica	Panomya norvegica	3	1.5029
CON_20m_R2	21	85786ece/d4be/11ee/be26/a0481c9e7d26	cde966ed+31d3+11ee+b719+a0481c9e7d26	Mollusca	Bivalvia	Cardiida	Cardiidae	Ciliatocardium	ciliatum	Ciliatocardium ciliatum	2	38.2306
CON_20m_R2	22	8bbcffb6/d4be/11ee/be26/a0481c9e7d26	cde966ed+31d3+11ee+b719+a0481c9e7d26	Mollusca	Bivalvia	Cardiida	Cardiidae	Serripes	groenlandicus	Serripes groenlandicus	1	4.881
CON_20m_R2	23	3fff857e/f1ad/11ee/af79/a0481c9e7d26	cde966ed+31d3+11ee+b719+a0481c9e7d26	Mollusca	Bivalvia	Cardiida	Tellinidae	Macoma	calcarea	Macoma calcarea	10	0.6558
CON_20m_R2	24	906fcd36/d4be/11ee/be26/a0481c9e7d26	cde966ed+31d3+11ee+b719+a0481c9e7d26	Mollusca	Bivalvia	Carditida	Astartidae	Tridonta	montagui	Tridonta montagui	15	1.8149
CON_20m_R2	25	c4c5f136/d7e9/11ee/a214/a0481c9e7d26	cde966ed+31d3+11ee+b719+a0481c9e7d26	Mollusca	Bivalvia	Lucinida	Thyasiridae	Axinopsida	orbiculata	Axinopsida orbiculata	9	0.0702
CON_20m_R2	26	c95b798c/d7e9/11ee/a214/a0481c9e7d26	cde966ed+31d3+11ee+b719+a0481c9e7d26	Mollusca	Bivalvia	Lucinida	Thyasiridae	Mendicula	ferruginosa	Mendicula ferruginosa	1	0.0001
CON_20m_R2	27	ccbe7e9e/d7e9/11ee/a214/a0481c9e7d26	cde966ed+31d3+11ee+b719+a0481c9e7d26	Mollusca	Bivalvia	Lucinida	Thyasiridae	Thyasira	gouldi	Thyasira gouldi	12	0.1084
CON_20m_R2	28	975ce71e/d4be/11ee/be26/a0481c9e7d26	cde966ed+31d3+11ee+b719+a0481c9e7d26	Mollusca	Bivalvia	Lucinida	Thyasiridae			Thyasiridae	27	0.0387
CON_20m_R2	29	43be2012/f1ad/11ee/af79/a0481c9e7d26	cde966ed+31d3+11ee+b719+a0481c9e7d26	Mollusca	Bivalvia	Myida	Myidae	Mya	truncata	Mya truncata	5	0.0287
CON_20m_R2	30	0769c35e/d642/11ee/be26/a0481c9e7d26	cde966ed+31d3+11ee+b719+a0481c9e7d26	Mollusca	Bivalvia	Mytilida	Mytilidae	Dacrydium	vitreum	Dacrydium vitreum	2	0.0155
CON_20m_R2	31	49baac56/f1ad/11ee/af79/a0481c9e7d26	cde966ed+31d3+11ee+b719+a0481c9e7d26	Mollusca	Bivalvia	Nuculanida	Yoldiidae	Yoldiella	frigida	Yoldiella frigida	1	0.003
CON_20m_R2	32	a02b1d0c/d4be/11ee/be26/a0481c9e7d26	cde966ed+31d3+11ee+b719+a0481c9e7d26	Mollusca	Bivalvia	Nuculanida	Yoldiidae	Yoldiella	lucida	Yoldiella lucida	1	0.0016
CON_20m_R2	33	46c1e88e/f1ad/11ee/af79/a0481c9e7d26	cde966ed+31d3+11ee+b719+a0481c9e7d26	Mollusca	Bivalvia	Nuculanida	Yoldiidae	Yoldiella	solidula	Yoldiella solidula	17	0.0537
CON_20m_R2	34	a91b87da/d4be/11ee/be26/a0481c9e7d26	cde966ed+31d3+11ee+b719+a0481c9e7d26	Mollusca	Bivalvia	Nuculida	Nuculidae	Ennucula	tenuis	Ennucula tenuis	9	0.2913
CON_20m_R2	35	c9456038/d646/11ee/be26/a0481c9e7d26	cde966ed+31d3+11ee+b719+a0481c9e7d26	Mollusca	Bivalvia	Nuculida	Nuculidae	Nuculana	pernula	Nuculana pernula	23	0.8469
CON_20m_R2	36	b2e40e40/d4be/11ee/be26/a0481c9e7d26	cde966ed+31d3+11ee+b719+a0481c9e7d26	Mollusca	Caudofoveata	Chaetodermatida	Chaetodermatidae	Chaetoderma	nitidulum	Chaetoderma nitidulum	6	0.00327
CON_20m_R2	37	b9535b64/d4be/11ee/be26/a0481c9e7d26	cde966ed+31d3+11ee+b719+a0481c9e7d26	Mollusca	Gastropoda	Littorinimorpha	Naticidae			Naticidae	1	0.0046
CON_20m_R2	38	c166c05c/d4be/11ee/be26/a0481c9e7d26	cde966ed+31d3+11ee+b719+a0481c9e7d26	Mollusca	Gastropoda	Neogastropoda	Cancellariidae	Admete		Admete sp.	3	0.0082
CON_20m_R2	39	c5e6476a/d4be/11ee/be26/a0481c9e7d26	cde966ed+31d3+11ee+b719+a0481c9e7d26	Mollusca	Gastropoda	Neogastropoda	Colidae	Colus		Colus sp.	2	0.0697
CON_20m_R2	40	c972d1fa/d4be/11ee/be26/a0481c9e7d26	cde966ed+31d3+11ee+b719+a0481c9e7d26	Mollusca	Gastropoda	Neogastropoda	Muricidae	Trophon		Trophon sp.	1	0.093
CON_20m_R2	41	cd8bc6d4/d4be/11ee/be26/a0481c9e7d26	cde966ed+31d3+11ee+b719+a0481c9e7d26	Mollusca	Gastropoda	Trochida	Margaritidae	Margarites		Margarites sp.	1	1.2469
CON_20m_R2	42	d104bae6/d4be/11ee/be26/a0481c9e7d26	cde966ed+31d3+11ee+b719+a0481c9e7d26	Mollusca	Gastropoda	Trochida	Trochidae			Trochidae	1	0.0047
CON_20m_R2	43	2c9f8d32/d4be/11ee/be26/a0481c9e7d26	cde966ed+31d3+11ee+b719+a0481c9e7d26	Priapulida		Priapulomorpha	Priapulidae	Priapulus	caudatus	Priapulus caudatus	6	0.0614
CON_20m_R2	44	d5e9b714/d4be/11ee/be26/a0481c9e7d26	cde966ed+31d3+11ee+b719+a0481c9e7d26	Segments						Segments		0.9273
CON_60m_R1	1	3f2424bc/dfb4/11ee/894d/a0481c9e7d26	947a1f84+31db+11ee+a870+a0481c9e7d26	Annelida	Polychaeta	Cossurida	Cossuridae	Cossura	longocirrata	Cossura longocirrata	1	0.0009
CON_60m_R1	2	4d010d7a/f80f/11ee/9c7c/a0481c9e7d26	947a1f84+31db+11ee+a870+a0481c9e7d26	Annelida	Polychaeta	Eunicida	Lumbrineridae	Lumbrineris	mixochaeta	Lumbrineris mixochaeta	5	0.2279
CON_60m_R1	3	47cb47da/dfb4/11ee/894d/a0481c9e7d26	947a1f84+31db+11ee+a870+a0481c9e7d26	Annelida	Polychaeta	Phyllodocida	Phyllodocidae	Phyllodoce	groenlandica	Phyllodoce groenlandica	1	0.0005
CON_60m_R1	4	547f276c/dfb4/11ee/894d/a0481c9e7d26	947a1f84+31db+11ee+a870+a0481c9e7d26	Annelida	Polychaeta	Phyllodocida	Polynoidae			Polynoidae	1	0.0043
CON_60m_R1	5	079cf974/fbf7/11ee/a2ac/a0481c9e7d26	947a1f84+31db+11ee+a870+a0481c9e7d26	Annelida	Polychaeta	Terebellida	Ampharetidae			Ampharetidae	1	0.0025
CON_60m_R1	6	58269256/dfb4/11ee/894d/a0481c9e7d26	947a1f84+31db+11ee+a870+a0481c9e7d26	Annelida	Polychaeta	Terebellida	Cirratulidae			Cirratulidae	152	0.4819
CON_60m_R1	7	3a36bb5e/dfb4/11ee/894d/a0481c9e7d26	947a1f84+31db+11ee+a870+a0481c9e7d26	Annelida	Polychaeta		Maldanidae	Maldane		Maldane sp.	24	1.6488
CON_60m_R1	8	4f84523c/dfb4/11ee/894d/a0481c9e7d26	947a1f84+31db+11ee+a870+a0481c9e7d26	Annelida	Polychaeta		Scalibregmatidae	Scalibregma	inflatum	Scalibregma inflatum	1	0.0016
CON_60m_R1	9	5c6906e6/dfb4/11ee/894d/a0481c9e7d26	947a1f84+31db+11ee+a870+a0481c9e7d26	Arthropoda	Malacostraca	Cumacea	Nannastacidae	Campylaspis	rubicunda	Campylaspis rubicunda	1	0.0004
CON_60m_R1	10	73e7795c/f1b5/11ee/af79/a0481c9e7d26	947a1f84+31db+11ee+a870+a0481c9e7d26	Echinodermata	Ophiuroidea	Ophiurida	Ophiuridae	Ophiocten	sericeum	Ophiocten sericeum	1	0.5515
CON_60m_R1	11	6916cc84/dfb4/11ee/894d/a0481c9e7d26	947a1f84+31db+11ee+a870+a0481c9e7d26	Mollusca	Bivalvia	Cardiida	Cardiidae	Ciliatocardium	ciliatum	Ciliatocardium ciliatum	1	0.0044
CON_60m_R1	12	73e7795c/f1b5/11ee/af79/a0481c9e7d26	947a1f84+31db+11ee+a870+a0481c9e7d26	Mollusca	Bivalvia	Cardiida	Tellinidae	Macoma	calcarea	Macoma calcarea	10	0.2958
CON_60m_R1	13	648c4a72/dfb4/11ee/894d/a0481c9e7d26	947a1f84+31db+11ee+a870+a0481c9e7d26	Mollusca	Bivalvia	Carditida	Astartidae	Tridonta	montagui	Tridonta montagui	3	0.0882
CON_60m_R1	14	6f665ba4/dfb4/11ee/894d/a0481c9e7d26	947a1f84+31db+11ee+a870+a0481c9e7d26	Mollusca	Bivalvia	Lucinida	Thyasiridae	Axinopsida	orbiculata	Axinopsida orbiculata	18	0.2743
CON_60m_R1	15	6f665ba4/dfb4/11ee/894d/a0481c9e7d26	947a1f84+31db+11ee+a870+a0481c9e7d26	Mollusca	Bivalvia	Lucinida	Thyasiridae	Mendicula	ferruginosa	Mendicula ferruginosa	1	0.0046
CON_60m_R1	16	7bfbb5e4/dfb4/11ee/894d/a0481c9e7d26	947a1f84+31db+11ee+a870+a0481c9e7d26	Mollusca	Bivalvia	Mytilida	Mytilidae	Dacrydium	vitreum	Dacrydium vitreum	15	0.0512
CON_60m_R1	17	89f611b8/f1b5/11ee/af79/a0481c9e7d26	947a1f84+31db+11ee+a870+a0481c9e7d26	Mollusca	Bivalvia	Nuculanida	Yoldiidae	Yoldiella	frigida	Yoldiella frigida	1	0.0035
CON_60m_R1	18	80e3725a/f1b5/11ee/af79/a0481c9e7d26	947a1f84+31db+11ee+a870+a0481c9e7d26	Mollusca	Bivalvia	Nuculanida	Yoldiidae	Yoldiella	lenticula	Yoldiella lenticula	1	0.0093
CON_60m_R1	19	9662b1d0/dfb4/11ee/894d/a0481c9e7d26	947a1f84+31db+11ee+a870+a0481c9e7d26	Mollusca	Bivalvia	Nuculanida	Yoldiidae	Yoldiella	lucida	Yoldiella lucida	2	0.0922
CON_60m_R1	20	7cde0602/f1b5/11ee/af79/a0481c9e7d26	947a1f84+31db+11ee+a870+a0481c9e7d26	Mollusca	Bivalvia	Nuculanida	Yoldiidae	Yoldiella	propinqua	Yoldiella propinqua	11	0.0075
CON_60m_R1	21	80e3725a/f1b5/11ee/af79/a0481c9e7d26	947a1f84+31db+11ee+a870+a0481c9e7d26	Mollusca	Bivalvia	Nuculanida	Yoldiidae	Yoldiella	solidula	Yoldiella solidula	31	0.1468
CON_60m_R1	22	8579c30e/dfb4/11ee/894d/a0481c9e7d26	947a1f84+31db+11ee+a870+a0481c9e7d26	Mollusca	Bivalvia	Nuculida	Nuculidae	Ennucula	tenuis	Ennucula tenuis	10	0.0658
CON_60m_R1	23	7bfbb5e4/dfb4/11ee/894d/a0481c9e7d26	947a1f84+31db+11ee+a870+a0481c9e7d26	Mollusca	Bivalvia	Nuculida	Nuculidae	Nuculana	pernula	Nuculana pernula	14	1.0671
CON_60m_R1	24	9aaa0f0e/dfb4/11ee/894d/a0481c9e7d26	947a1f84+31db+11ee+a870+a0481c9e7d26	Mollusca	Caudofoveata	Chaetodermatida	Chaetodermatidae	Chaetoderma	nitidulum	Chaetoderma nitidulum	1	0.0221
CON_60m_R1	25	9f126000/dfb4/11ee/894d/a0481c9e7d26	947a1f84+31db+11ee+a870+a0481c9e7d26	Mollusca	Gastropoda	Cephalaspidea	Retusidae	Retusa		Retusa sp.	9	0.2842
CON_60m_R1	26	a897c53e/dfb4/11ee/894d/a0481c9e7d26	947a1f84+31db+11ee+a870+a0481c9e7d26	Mollusca	Gastropoda	Littorinimorpha	Rissoidae	Alvania	scrobiculata	Alvania scrobiculata	2	0.0031
CON_60m_R1	27	ad21186c/dfb4/11ee/894d/a0481c9e7d26	947a1f84+31db+11ee+a870+a0481c9e7d26	Mollusca	Gastropoda	Littorinimorpha	Rissoidae	Frigidoalvania	janmayeni	Frigidoalvania janmayeni	4	0.0068
CON_60m_R1	28	b1031944/dfb4/11ee/894d/a0481c9e7d26	947a1f84+31db+11ee+a870+a0481c9e7d26	Priapulida		Priapulomorpha	Priapulidae	Priapulus	caudatus	Priapulus caudatus	2	0.0252
CON_60m_R1	29	b4c1a76c/dfb4/11ee/894d/a0481c9e7d26	947a1f84+31db+11ee+a870+a0481c9e7d26	Segments						Segments		4.1325
CON_60m_R2	1	4d010d7a/f80f/11ee/9c7c/a0481c9e7d26	947a1f85+31db+11ee+a870+a0481c9e7d26	Annelida	Polychaeta	Eunicida	Lumbrineridae	Lumbrineris	mixochaeta	Lumbrineris mixochaeta	12	0.0082
CON_60m_R2	2	35fddd80/e2c8/11ee/a80a/a0481c9e7d26	947a1f85+31db+11ee+a870+a0481c9e7d26	Annelida	Polychaeta	Phyllodocida	Goniadidae			Goniadidae	1	0.0014
CON_60m_R2	3	2818af06/e2c8/11ee/a80a/a0481c9e7d26	947a1f85+31db+11ee+a870+a0481c9e7d26	Annelida	Polychaeta	Phyllodocida	Phyllodocidae			Phyllodocidae	1	0.0001
CON_60m_R2	4	2cbe183e/e2c8/11ee/a80a/a0481c9e7d26	947a1f85+31db+11ee+a870+a0481c9e7d26	Annelida	Polychaeta	Phyllodocida	Polynoidae			Polynoidae	1	0.0012
CON_60m_R2	5	3a69ddd8/e2c8/11ee/a80a/a0481c9e7d26	947a1f85+31db+11ee+a870+a0481c9e7d26	Annelida	Polychaeta	Terebellida	Cirratulidae			Cirratulidae	148	0.3143
CON_60m_R2	6	1a74d87a/e2c8/11ee/a80a/a0481c9e7d26	947a1f85+31db+11ee+a870+a0481c9e7d26	Annelida	Polychaeta		Maldanidae	Maldane		Maldane sp.	6	0.3877
CON_60m_R2	7	2cbe183e/e2c8/11ee/a80a/a0481c9e7d26	947a1f85+31db+11ee+a870+a0481c9e7d26	Annelida	Polychaeta		Scalibregmatidae	Scalibregma	inflatum	Scalibregma inflatum	1	0.0009
CON_60m_R2	8	3a69ddd8/e2c8/11ee/a80a/a0481c9e7d26	947a1f85+31db+11ee+a870+a0481c9e7d26	Arthropoda	Malacostraca	Amphipoda	Ampeliscidae	Ampelisca	macrocephala	Ampelisca macrocephala	2	0.0219
CON_60m_R2	9	45af664a/e2c8/11ee/a80a/a0481c9e7d26	947a1f85+31db+11ee+a870+a0481c9e7d26	Arthropoda	Malacostraca	Amphipoda	Uristidae	Anonyx	bispinosus	Anonyx bispinosus	1	0.0406
CON_60m_R2	10	4ae26ae0/e2c8/11ee/a80a/a0481c9e7d26	947a1f85+31db+11ee+a870+a0481c9e7d26	Arthropoda	Malacostraca	Cumacea	Nannastacidae	Campylaspis	rubicunda	Campylaspis rubicunda	3	0.0031
CON_60m_R2	11	1533fdee/fbf7/11ee/a2ac/a0481c9e7d26	947a1f85+31db+11ee+a870+a0481c9e7d26	Chordata	Ascidiacea	Stolidobranchia	Styelidae	Styela	coriacea	Styela coriacea	1	1.462
CON_60m_R2	12	4ae26ae0/e2c8/11ee/a80a/a0481c9e7d26	947a1f85+31db+11ee+a870+a0481c9e7d26	Cnidaria	Anthozoa	Actiniaria	Actiniidae	Bolocera	tuediae	Bolocera tuediae	1	0.204
CON_60m_R2	13	64fa0af0/e2c8/11ee/a80a/a0481c9e7d26	947a1f85+31db+11ee+a870+a0481c9e7d26	Mollusca	Bivalvia	Adapedonta	Hiatellidae	Panomya	norvegica	Panomya norvegica	1	0.4786
CON_60m_R2	14	60375004/e2c8/11ee/a80a/a0481c9e7d26	947a1f85+31db+11ee+a870+a0481c9e7d26	Mollusca	Bivalvia	Arcida	Arcidae	Bathyarca	glacialis	Bathyarca glacialis	1	0.0523
CON_60m_R2	15	6b424562/e2c8/11ee/a80a/a0481c9e7d26	947a1f85+31db+11ee+a870+a0481c9e7d26	Mollusca	Bivalvia	Cardiida	Cardiidae	Ciliatocardium	ciliatum	Ciliatocardium ciliatum	1	0.251
CON_60m_R2	16	8e0aaca4/f1bb/11ee/af79/a0481c9e7d26	947a1f85+31db+11ee+a870+a0481c9e7d26	Mollusca	Bivalvia	Cardiida	Tellinidae	Macoma	calcarea	Macoma calcarea	34	0.386
CON_60m_R2	17	6b424562/e2c8/11ee/a80a/a0481c9e7d26	947a1f85+31db+11ee+a870+a0481c9e7d26	Mollusca	Bivalvia	Lucinida	Thyasiridae	Axinopsida	orbiculata	Axinopsida orbiculata	16	0.0851
CON_60m_R2	18	78d59bb6/e2c8/11ee/a80a/a0481c9e7d26	947a1f85+31db+11ee+a870+a0481c9e7d26	Mollusca	Bivalvia	Mytilida	Mytilidae	Dacrydium	vitreum	Dacrydium vitreum	20	0.1535
CON_60m_R2	19	9d92b900/f1bb/11ee/af79/a0481c9e7d26	947a1f85+31db+11ee+a870+a0481c9e7d26	Mollusca	Bivalvia	Nuculanida	Yoldiidae	Yoldiella	frigida	Yoldiella frigida	1	0.005
CON_60m_R2	20	997274aa/f1bb/11ee/af79/a0481c9e7d26	947a1f85+31db+11ee+a870+a0481c9e7d26	Mollusca	Bivalvia	Nuculanida	Yoldiidae	Yoldiella	lenticula	Yoldiella lenticula	9	0.1097
CON_60m_R2	21	91f196ac/f1bb/11ee/af79/a0481c9e7d26	947a1f85+31db+11ee+a870+a0481c9e7d26	Mollusca	Bivalvia	Nuculanida	Yoldiidae	Yoldiella	propinqua	Yoldiella propinqua	16	0.0236
CON_60m_R2	22	8e0aaca4/f1bb/11ee/af79/a0481c9e7d26	947a1f85+31db+11ee+a870+a0481c9e7d26	Mollusca	Bivalvia	Nuculanida	Yoldiidae	Yoldiella	solidula	Yoldiella solidula	50	0.2916
CON_60m_R2	23	84079d90/e2c8/11ee/a80a/a0481c9e7d26	947a1f85+31db+11ee+a870+a0481c9e7d26	Mollusca	Bivalvia	Nuculida	Nuculidae	Ennucula	tenuis	Ennucula tenuis	6	0.0158
CON_60m_R2	24	7e1e9ee2/e2c8/11ee/a80a/a0481c9e7d26	947a1f85+31db+11ee+a870+a0481c9e7d26	Mollusca	Bivalvia	Nuculida	Nuculidae	Nuculana	pernula	Nuculana pernula	16	0.1655
CON_60m_R2	25	a29c47e2/e2c8/11ee/a80a/a0481c9e7d26	947a1f85+31db+11ee+a870+a0481c9e7d26	Mollusca	Caudofoveata	Chaetodermatida	Chaetodermatidae	Chaetoderma	nitidulum	Chaetoderma nitidulum	1	0.0048
CON_60m_R2	26	a29c47e2/e2c8/11ee/a80a/a0481c9e7d26	947a1f85+31db+11ee+a870+a0481c9e7d26	Mollusca	Gastropoda	Cephalaspidea	Retusidae	Retusa		Retusa sp.	6	0.0105
CON_60m_R2	27	a29c47e2/e2c8/11ee/a80a/a0481c9e7d26	947a1f85+31db+11ee+a870+a0481c9e7d26	Mollusca	Gastropoda	Littorinimorpha	Rissoidae	Frigidoalvania	janmayeni	Frigidoalvania janmayeni	1	0.0024
CON_60m_R2	28	ac32c042/e2c8/11ee/a80a/a0481c9e7d26	947a1f85+31db+11ee+a870+a0481c9e7d26	Nemertea						Nemertea	1	0.0095
CON_60m_R2	29	b01fc420/e2c8/11ee/a80a/a0481c9e7d26	947a1f85+31db+11ee+a870+a0481c9e7d26	Priapulida		Priapulomorpha	Priapulidae	Priapulus	caudatus	Priapulus caudatus	2	0.0253
CON_60m_R2	30	b406a9fa/e2c8/11ee/a80a/a0481c9e7d26	947a1f85+31db+11ee+a870+a0481c9e7d26	Segments						Segments		1.3848
MGL_20m_R1	1	18a54086/e604/11ee/8904/a0481c9e7d26	188afde6/1842/11ef/a39f/a0481c9e7d26	Annelida	Polychaeta	Cossurida	Cossuridae	Cossura	longocirrata	Cossura longocirrata	17	0.0182
MGL_20m_R1	2	1d3718d6/e604/11ee/8904/a0481c9e7d26	188afde6/1842/11ef/a39f/a0481c9e7d26	Annelida	Polychaeta	Phyllodocida	Goniadidae			Goniadidae	1	0.0038
MGL_20m_R1	3	21191a08/e604/11ee/8904/a0481c9e7d26	188afde6/1842/11ef/a39f/a0481c9e7d26	Annelida	Polychaeta	Phyllodocida	Nephtyidae	Nephtys	ciliata	Nephtys ciliata	1	1.1065
MGL_20m_R1	4	250ea376/e604/11ee/8904/a0481c9e7d26	188afde6/1842/11ef/a39f/a0481c9e7d26	Annelida	Polychaeta	Phyllodocida	Polynoidae			Polynoidae	2	0.0062
MGL_20m_R1	5	41168152/f1c0/11ee/af79/a0481c9e7d26	188afde6/1842/11ef/a39f/a0481c9e7d26	Annelida	Polychaeta	Terebellida	Ampharetidae			Ampharetidae	1	0.2368
MGL_20m_R1	6	250ea376/e604/11ee/8904/a0481c9e7d26	188afde6/1842/11ef/a39f/a0481c9e7d26	Annelida	Polychaeta	Terebellida	Cirratulidae			Cirratulidae	204	1.4302
MGL_20m_R1	7	28a89be0/e604/11ee/8904/a0481c9e7d26	188afde6/1842/11ef/a39f/a0481c9e7d26	Cnidaria	Hexacorallia	Spirularia	Cerianthidae	Cerianthus		Cerianthus sp.	1	1.5122
MGL_20m_R1	8	30e6b88c/e604/11ee/8904/a0481c9e7d26	188afde6/1842/11ef/a39f/a0481c9e7d26	Echinodermata	Ophiuroidea	Ophiurida	Ophiuridae	Ophiura	sarsii	Ophiura sarsii	3	0.0002
MGL_20m_R1	9	41168152/f1c0/11ee/af79/a0481c9e7d26	188afde6/1842/11ef/a39f/a0481c9e7d26	Mollusca	Bivalvia	Cardiida	Tellinidae	Macoma	calcarea	Macoma calcarea	1	0.0002
MGL_20m_R1	10	30e6b88c/e604/11ee/8904/a0481c9e7d26	188afde6/1842/11ef/a39f/a0481c9e7d26	Mollusca	Bivalvia	Lucinida	Thyasiridae	Axinopsida	orbiculata	Axinopsida orbiculata	20	0.4336
MGL_20m_R1	11	35bcf574/e604/11ee/8904/a0481c9e7d26	188afde6/1842/11ef/a39f/a0481c9e7d26	Mollusca	Bivalvia	Lucinida	Thyasiridae	Mendicula	ferruginosa	Mendicula ferruginosa	15	0.0101
MGL_20m_R1	12	3ed1ffb0/e604/11ee/8904/a0481c9e7d26	188afde6/1842/11ef/a39f/a0481c9e7d26	Mollusca	Bivalvia	Lucinida	Thyasiridae	Thyasira	gouldi	Thyasira gouldi	6	0.1466
MGL_20m_R1	13	4b0817a6/e604/11ee/8904/a0481c9e7d26	188afde6/1842/11ef/a39f/a0481c9e7d26	Mollusca	Bivalvia	Nuculanida	Yoldiidae	Yoldia	hyperborea	Yoldia hyperborea	2	1.5456
MGL_20m_R1	14	41ebbee8/e604/11ee/8904/a0481c9e7d26	188afde6/1842/11ef/a39f/a0481c9e7d26	Mollusca	Bivalvia	Nuculida	Nuculidae	Ennucula	tenuis	Ennucula tenuis	4	0.0047
MGL_20m_R1	15	4e970ddc/e604/11ee/8904/a0481c9e7d26	188afde6/1842/11ef/a39f/a0481c9e7d26	Nemertea						Nemertea	1	0.0026
MGL_20m_R1	16	5a740330/e604/11ee/8904/a0481c9e7d26	188afde6/1842/11ef/a39f/a0481c9e7d26	Segments						Segments		0.3274
MGL_20m_R2	1	aa079f1e/e76d/11ee/bb61/a0481c9e7d26	188afde6/1842/11ef/a39f/a0481c9e7d26	Annelida	Polychaeta	Cossurida	Cossuridae	Cossura	longocirrata	Cossura longocirrata	3	0.0004
MGL_20m_R2	2	2efb2096/fcaf/11ee/955d/a0481c9e7d26	188afde6/1842/11ef/a39f/a0481c9e7d26	Annelida	Polychaeta	Eunicida	Lumbrineridae	Lumbrineris	mixochaeta	Lumbrineris mixochaeta	1	0.0013
MGL_20m_R2	3	ad6d1062/e76d/11ee/bb61/a0481c9e7d26	188afde6/1842/11ef/a39f/a0481c9e7d26	Annelida	Polychaeta	Phyllodocida	Nephtyidae	Aglaophamus	rubella	Aglaophamus rubella	1	0.0213
MGL_20m_R2	4	b4b96654/e76d/11ee/bb61/a0481c9e7d26	188afde6/1842/11ef/a39f/a0481c9e7d26	Annelida	Polychaeta	Phyllodocida	Nephtyidae	Nephtys	ciliata	Nephtys ciliata	2	0.0177
MGL_20m_R2	5	a64cad56/e76d/11ee/bb61/a0481c9e7d26	188afde6/1842/11ef/a39f/a0481c9e7d26	Annelida	Polychaeta	Terebellida	Ampharetidae			Ampharetidae	2	0.1296
MGL_20m_R2	6	b8c3b542/e76d/11ee/bb61/a0481c9e7d26	188afde6/1842/11ef/a39f/a0481c9e7d26	Annelida	Polychaeta	Terebellida	Cirratulidae			Cirratulidae	98	0.4495
MGL_20m_R2	7	c0f5a2fc/e76d/11ee/bb61/a0481c9e7d26	188afde6/1842/11ef/a39f/a0481c9e7d26	Echinodermata	Echinoidea	Camarodonta	Echinidae	Echinus	esculentus	Echinus esculentus	1	0.0013
MGL_20m_R2	8	b8c3b542/e76d/11ee/bb61/a0481c9e7d26	188afde6/1842/11ef/a39f/a0481c9e7d26	Echinodermata	Ophiuroidea	Ophiurida	Ophiuridae	Ophiura	robusta	Ophiura robusta	3	0.0077
MGL_20m_R2	9	03d191aa/f1c6/11ee/af79/a0481c9e7d26	188afde6/1842/11ef/a39f/a0481c9e7d26	Mollusca	Bivalvia	Cardiida	Tellinidae	Macoma	calcarea	Macoma calcarea	6	0.0855
MGL_20m_R2	10	c552f804/e76d/11ee/bb61/a0481c9e7d26	188afde6/1842/11ef/a39f/a0481c9e7d26	Mollusca	Bivalvia	Lucinida	Thyasiridae	Axinopsida	orbiculata	Axinopsida orbiculata	10	0.2005
MGL_20m_R2	11	c99b9290/e76d/11ee/bb61/a0481c9e7d26	188afde6/1842/11ef/a39f/a0481c9e7d26	Mollusca	Bivalvia	Lucinida	Thyasiridae	Mendicula	ferruginosa	Mendicula ferruginosa	19	0.029
MGL_20m_R2	12	c99b9290/e76d/11ee/bb61/a0481c9e7d26	188afde6/1842/11ef/a39f/a0481c9e7d26	Mollusca	Bivalvia	Lucinida	Thyasiridae	Thyasira	gouldi	Thyasira gouldi	3	0.0612
MGL_20m_R2	13	03d191aa/f1c6/11ee/af79/a0481c9e7d26	188afde6/1842/11ef/a39f/a0481c9e7d26	Mollusca	Bivalvia	Nuculanida	Yoldiidae	Yoldiella	lenticula	Yoldiella lenticula	2	0.0098
MGL_20m_R2	14	d051bb14/e76d/11ee/bb61/a0481c9e7d26	188afde6/1842/11ef/a39f/a0481c9e7d26	Mollusca	Bivalvia	Nuculida	Nuculidae	Ennucula	tenuis	Ennucula tenuis	11	0.1123
MGL_20m_R2	15	f076f2ec/e76d/11ee/bb61/a0481c9e7d26	188afde6/1842/11ef/a39f/a0481c9e7d26	Segments						Segments		0.0829
MGL_60m_R1	1	265dcc08/e851/11ee/bb61/a0481c9e7d26	1bb35ebe/1842/11ef/a39f/a0481c9e7d26	Annelida	Polychaeta	Cossurida	Cossuridae	Cossura	longocirrata	Cossura longocirrata	1	0.0001
MGL_60m_R1	2	3a4892f8/fcaf/11ee/955d/a0481c9e7d26	1bb35ebe/1842/11ef/a39f/a0481c9e7d26	Annelida	Polychaeta	Eunicida	Lumbrineridae	Lumbrineris	mixochaeta	Lumbrineris mixochaeta	16	0.3702
MGL_60m_R1	3	30b061c0/e851/11ee/bb61/a0481c9e7d26	1bb35ebe/1842/11ef/a39f/a0481c9e7d26	Annelida	Polychaeta	Phyllodocida	Goniadidae			Goniadidae	4	0.0216
MGL_60m_R1	4	38956674/e851/11ee/bb61/a0481c9e7d26	1bb35ebe/1842/11ef/a39f/a0481c9e7d26	Annelida	Polychaeta	Phyllodocida	Polynoidae			Polynoidae	1	0.0019
MGL_60m_R1	5	265dcc08/e851/11ee/bb61/a0481c9e7d26	1bb35ebe/1842/11ef/a39f/a0481c9e7d26	Annelida	Polychaeta	Terebellida	Ampharetidae			Ampharetidae	2	0.1719
MGL_60m_R1	6	3c1e46ee/e851/11ee/bb61/a0481c9e7d26	1bb35ebe/1842/11ef/a39f/a0481c9e7d26	Annelida	Polychaeta	Terebellida	Cirratulidae			Cirratulidae	231	1.1377
MGL_60m_R1	7	403c1ea4/e851/11ee/bb61/a0481c9e7d26	1bb35ebe/1842/11ef/a39f/a0481c9e7d26	Cnidaria	Hexacorallia	Spirularia	Cerianthidae	Cerianthus		Cerianthus sp.	1	0.0061
MGL_60m_R1	8	44b7f44e/e851/11ee/bb61/a0481c9e7d26	1bb35ebe/1842/11ef/a39f/a0481c9e7d26	Echinodermata	Ophiuroidea	Ophiurida	Ophiuridae	Ophiocten	sericeum	Ophiocten sericeum	1	0.0001
MGL_60m_R1	9	4915540a/e851/11ee/bb61/a0481c9e7d26	1bb35ebe/1842/11ef/a39f/a0481c9e7d26	Echinodermata	Ophiuroidea	Ophiurida	Ophiuridae	Ophiura	robusta	Ophiura robusta	1	0.0152
MGL_60m_R1	10	4d47e826/e851/11ee/bb61/a0481c9e7d26	1bb35ebe/1842/11ef/a39f/a0481c9e7d26	Mollusca	Bivalvia	Lucinida	Thyasiridae	Axinopsida	orbiculata	Axinopsida orbiculata	7	0.0137
MGL_60m_R1	11	52418f62/e851/11ee/bb61/a0481c9e7d26	1bb35ebe/1842/11ef/a39f/a0481c9e7d26	Mollusca	Bivalvia	Lucinida	Thyasiridae	Mendicula	ferruginosa	Mendicula ferruginosa	2	0.0041
MGL_60m_R1	12	5660a4c0/e851/11ee/bb61/a0481c9e7d26	1bb35ebe/1842/11ef/a39f/a0481c9e7d26	Mollusca	Bivalvia	Nuculanida	Yoldiidae	Yoldiella	frigida	Yoldiella frigida	26	0.0515
MGL_60m_R1	13	5a4edc96/e851/11ee/bb61/a0481c9e7d26	1bb35ebe/1842/11ef/a39f/a0481c9e7d26	Mollusca	Bivalvia	Nuculanida	Yoldiidae	Yoldiella	lenticula	Yoldiella lenticula	3	0.0099
MGL_60m_R1	14	60f519a2/e851/11ee/bb61/a0481c9e7d26	1bb35ebe/1842/11ef/a39f/a0481c9e7d26	Mollusca	Bivalvia	Nuculanida	Yoldiidae	Yoldiella	lucida	Yoldiella lucida	1	0.0298
MGL_60m_R1	15	5660a4c0/e851/11ee/bb61/a0481c9e7d26	1bb35ebe/1842/11ef/a39f/a0481c9e7d26	Mollusca	Bivalvia	Nuculida	Nuculidae	Ennucula	tenuis	Ennucula tenuis	4	0.0033
MGL_60m_R1	16	6434b550/e851/11ee/bb61/a0481c9e7d26	1bb35ebe/1842/11ef/a39f/a0481c9e7d26	Mollusca	Gastropoda	Cephalaspidea	Retusidae	Retusa		Retusa sp.	2	0.0028
MGL_60m_R1	17	67b159ea/e851/11ee/bb61/a0481c9e7d26	1bb35ebe/1842/11ef/a39f/a0481c9e7d26	Segments						Segments		0.7809
MGL_60m_R2	1	81ed68b8/eaad/11ee/8734/a0481c9e7d26	1bb35ebe/1842/11ef/a39f/a0481c9e7d26	Annelida	Polychaeta	Cossurida	Cossuridae	Cossura	longocirrata	Cossura longocirrata	1	0.0001
MGL_60m_R2	2	3f115d6a/fcaf/11ee/955d/a0481c9e7d26	1bb35ebe/1842/11ef/a39f/a0481c9e7d26	Annelida	Polychaeta	Eunicida	Lumbrineridae	Lumbrineris	mixochaeta	Lumbrineris mixochaeta	8	0.0214
MGL_60m_R2	3	873c4122/eaad/11ee/8734/a0481c9e7d26	1bb35ebe/1842/11ef/a39f/a0481c9e7d26	Annelida	Polychaeta	Phyllodocida	Polynoidae			Polynoidae	2	0.001
MGL_60m_R2	4	8d49df7a/eaad/11ee/8734/a0481c9e7d26	1bb35ebe/1842/11ef/a39f/a0481c9e7d26	Annelida	Polychaeta	Terebellida	Cirratulidae			Cirratulidae	200	0.6937
MGL_60m_R2	5	910fcf34/eaad/11ee/8734/a0481c9e7d26	1bb35ebe/1842/11ef/a39f/a0481c9e7d26	Arthropoda	Malacostraca	Cumacea	Nannastacidae	Campylaspis	rubicunda	Campylaspis rubicunda	1	0.0015
MGL_60m_R2	6	95376b30/eaad/11ee/8734/a0481c9e7d26	1bb35ebe/1842/11ef/a39f/a0481c9e7d26	Echinodermata	Ophiuroidea	Ophiurida	Ophiuridae	Ophiura	robusta	Ophiura robusta	7	0.0021
MGL_60m_R2	7	98c52c1a/eaad/11ee/8734/a0481c9e7d26	1bb35ebe/1842/11ef/a39f/a0481c9e7d26	Mollusca	Bivalvia	Lucinida	Thyasiridae	Axinopsida	orbiculata	Axinopsida orbiculata	5	0.0051
MGL_60m_R2	8	9d0186b6/eaad/11ee/8734/a0481c9e7d26	1bb35ebe/1842/11ef/a39f/a0481c9e7d26	Mollusca	Bivalvia	Lucinida	Thyasiridae	Mendicula	ferruginosa	Mendicula ferruginosa	4	0.0093
MGL_60m_R2	9	aaee0c0e/eaad/11ee/8734/a0481c9e7d26	1bb35ebe/1842/11ef/a39f/a0481c9e7d26	Mollusca	Bivalvia	Nuculanida	Yoldiidae	Yoldiella	frigida	Yoldiella frigida	43	0.1021
MGL_60m_R2	10	ae8ba632/eaad/11ee/8734/a0481c9e7d26	1bb35ebe/1842/11ef/a39f/a0481c9e7d26	Mollusca	Bivalvia	Nuculanida	Yoldiidae	Yoldiella	lenticula	Yoldiella lenticula	5	0.0191
MGL_60m_R2	11	9d0186b6/eaad/11ee/8734/a0481c9e7d26	1bb35ebe/1842/11ef/a39f/a0481c9e7d26	Mollusca	Bivalvia	Nuculida	Nuculidae	Ennucula	tenuis	Ennucula tenuis	13	0.0081
MGL_60m_R2	12	a5a504b4/eaad/11ee/8734/a0481c9e7d26	1bb35ebe/1842/11ef/a39f/a0481c9e7d26	Mollusca	Bivalvia	Nuculida	Nuculidae	Nuculana	pernula	Nuculana pernula	1	0.0074
MGL_60m_R2	13	b18bc114/eaad/11ee/8734/a0481c9e7d26	1bb35ebe/1842/11ef/a39f/a0481c9e7d26	Mollusca	Gastropoda	Cephalaspidea	Retusidae	Retusa		Retusa sp.	5	0.1207
MGL_60m_R2	14	b48bd886/eaad/11ee/8734/a0481c9e7d26	1bb35ebe/1842/11ef/a39f/a0481c9e7d26	Segments						Segments		0.3281
RIV_20m_R1	1	084036be/fcb2/11ee/955d/a0481c9e7d26	c82dffa8+31db+11ee+a870+a0481c9e7d26	Annelida	Polychaeta	Eunicida	Lumbrineridae	Lumbrineris	mixochaeta	Lumbrineris mixochaeta	3	0.0024
RIV_20m_R1	2	14ccfc3a/f345/11ee/a25f/a0481c9e7d26	c82dffa8+31db+11ee+a870+a0481c9e7d26	Annelida	Polychaeta	Terebellida	Ampharetidae			Ampharetidae	4	0.0772
RIV_20m_R1	3	250dff40/f345/11ee/a25f/a0481c9e7d26	c82dffa8+31db+11ee+a870+a0481c9e7d26	Annelida	Polychaeta	Terebellida	Cirratulidae			Cirratulidae	7	0.0095
RIV_20m_R1	4	fe3481b6/fcb1/11ee/955d/a0481c9e7d26	c82dffa8+31db+11ee+a870+a0481c9e7d26	Annelida	Polychaeta	Terebellida	Terebellidae	Polycirrus	arcticus	Polycirrus arcticus	1	0.0076
RIV_20m_R1	5	1dc42174/f345/11ee/a25f/a0481c9e7d26	c82dffa8+31db+11ee+a870+a0481c9e7d26	Annelida	Polychaeta		Oweniidae			Oweniidae	1	0.0137
RIV_20m_R1	6	40718788/fbf7/11ee/a2ac/a0481c9e7d26	c82dffa8+31db+11ee+a870+a0481c9e7d26	Annelida	Polychaeta		Paraonidae	Aricidea		Aricidea sp.	1	0.0014
RIV_20m_R1	7	0ee05d3c/fcb2/11ee/955d/a0481c9e7d26	c82dffa8+31db+11ee+a870+a0481c9e7d26	Arthropoda	Malacostraca	Amphipoda	Eusiridae	Eusirus	holmii	Eusirus holmii	2	0.0252
RIV_20m_R1	8	28acdc52/f345/11ee/a25f/a0481c9e7d26	c82dffa8+31db+11ee+a870+a0481c9e7d26	Echinodermata	Ophiuroidea	Ophiurida	Ophiuridae	Ophiura	robusta	Ophiura robusta	5	0.0019
RIV_20m_R1	9	321c4638/f345/11ee/a25f/a0481c9e7d26	c82dffa8+31db+11ee+a870+a0481c9e7d26	Mollusca	Bivalvia	Anomalodesmata	Cuspidariidae	Cuspidaria	obesa	Cuspidaria obesa	2	0.0008
RIV_20m_R1	10	35792832/f345/11ee/a25f/a0481c9e7d26	c82dffa8+31db+11ee+a870+a0481c9e7d26	Mollusca	Bivalvia	Cardiida	Tellinidae	Macoma	calcarea	Macoma calcarea	1	0.0101
RIV_20m_R1	11	35792832/f345/11ee/a25f/a0481c9e7d26	c82dffa8+31db+11ee+a870+a0481c9e7d26	Mollusca	Bivalvia	Carditida	Astartidae	Tridonta	elliptica	Tridonta elliptica	7	9.0918
RIV_20m_R1	12	3fdb8d2e/f345/11ee/a25f/a0481c9e7d26	c82dffa8+31db+11ee+a870+a0481c9e7d26	Mollusca	Bivalvia	Carditida	Astartidae	Tridonta	montagui	Tridonta montagui	4	1.1001
RIV_20m_R1	13	44290b18/f345/11ee/a25f/a0481c9e7d26	c82dffa8+31db+11ee+a870+a0481c9e7d26	Mollusca	Bivalvia	Lucinida	Thyasiridae	Axinopsida	orbiculata	Axinopsida orbiculata	4	0.0034
RIV_20m_R1	14	49c50fcc/f345/11ee/a25f/a0481c9e7d26	c82dffa8+31db+11ee+a870+a0481c9e7d26	Mollusca	Bivalvia	Lucinida	Thyasiridae	Mendicula	ferruginosa	Mendicula ferruginosa	1	0.0001
RIV_20m_R1	15	4e9b559c/f345/11ee/a25f/a0481c9e7d26	c82dffa8+31db+11ee+a870+a0481c9e7d26	Mollusca	Bivalvia	Lucinida	Thyasiridae	Thyasira	gouldi	Thyasira gouldi	1	0.0109
RIV_20m_R1	16	5699f38e/f345/11ee/a25f/a0481c9e7d26	c82dffa8+31db+11ee+a870+a0481c9e7d26	Mollusca	Bivalvia	Nuculida	Nuculidae	Ennucula	tenuis	Ennucula tenuis	7	0.0887
RIV_20m_R1	17	528e6716/f345/11ee/a25f/a0481c9e7d26	c82dffa8+31db+11ee+a870+a0481c9e7d26	Mollusca	Bivalvia	Nuculida	Nuculidae	Nuculana	pernula	Nuculana pernula	1	0.0181
RIV_20m_R1	18	5b2f7284/f345/11ee/a25f/a0481c9e7d26	c82dffa8+31db+11ee+a870+a0481c9e7d26	Mollusca	Gastropoda	Littorinimorpha	Rissoidae	Frigidoalvania	janmayeni	Frigidoalvania janmayeni	1	0.0001
RIV_20m_R1	19	5f7ba952/f345/11ee/a25f/a0481c9e7d26	c82dffa8+31db+11ee+a870+a0481c9e7d26	Segments						Segments		0.0688
RIV_20m_R2	1	8c4d2e0c/f5a6/11ee/a89a/a0481c9e7d26	c82dffa9+31db+11ee+a870+a0481c9e7d28	Annelida	Polychaeta	Eunicida	Lumbrineridae	Abyssoninoe		Abyssoninoe sp.	1	0.0005
RIV_20m_R2	2	4af13faa/fbf7/11ee/a2ac/a0481c9e7d26	c82dffa9+31db+11ee+a870+a0481c9e7d29	Annelida	Polychaeta	Spionida	Spionidae			Spionidae	1	0.0001
RIV_20m_R2	3	717a3b4c/f5a6/11ee/a89a/a0481c9e7d26	c82dffa9+31db+11ee+a870+a0481c9e7d26	Annelida	Polychaeta	Terebellida	Ampharetidae			Ampharetidae	7	0.0795
RIV_20m_R2	4	940ff214/f5a6/11ee/a89a/a0481c9e7d26	c82dffa9+31db+11ee+a870+a0481c9e7d26	Annelida	Polychaeta	Terebellida	Cirratulidae			Cirratulidae	1	0.0001
RIV_20m_R2	5	8c4d2e0c/f5a6/11ee/a89a/a0481c9e7d26	c82dffa9+31db+11ee+a870+a0481c9e7d27	Annelida	Polychaeta		Maldanidae	Maldane		Maldane sp.	1	0.0052
RIV_20m_R2	6	ff280ba6/fcb6/11ee/955d/a0481c9e7d26	c82dffa9+31db+11ee+a870+a0481c9e7d26	Arthropoda	Malacostraca	Amphipoda	Eusiridae	Eusirus	holmii	Eusirus holmii	2	0.0091
RIV_20m_R2	7	4f510be8/fbf7/11ee/a2ac/a0481c9e7d26	c82dffa9+31db+11ee+a870+a0481c9e7d26	Cnidaria	Hexacorallia	Spirularia	Cerianthidae	Cerianthus		Cerianthus sp.	1	0.0031
RIV_20m_R2	8	999aef2c/f5a6/11ee/a89a/a0481c9e7d26	c82dffa9+31db+11ee+a870+a0481c9e7d26	Echinodermata	Ophiuroidea	Ophiurida	Ophiuridae	Ophiocten	sericeum	Ophiocten sericeum	5	0.0016
RIV_20m_R2	9	9d71ece0/f5a6/11ee/a89a/a0481c9e7d26	c82dffa9+31db+11ee+a870+a0481c9e7d26	Mollusca	Bivalvia	Carditida	Astartidae	Tridonta	elliptica	Tridonta elliptica	8	8.8499
RIV_20m_R2	10	9d71ece0/f5a6/11ee/a89a/a0481c9e7d26	c82dffa9+31db+11ee+a870+a0481c9e7d26	Mollusca	Bivalvia	Carditida	Astartidae	Tridonta	montagui	Tridonta montagui	5	1.8389
RIV_20m_R2	11	a3e7575e/f5a6/11ee/a89a/a0481c9e7d26	c82dffa9+31db+11ee+a870+a0481c9e7d26	Mollusca	Bivalvia	Lucinida	Thyasiridae	Axinopsida	orbiculata	Axinopsida orbiculata	5	0.0061
RIV_20m_R2	12	ac68a5c2/f5a6/11ee/a89a/a0481c9e7d26	c82dffa9+31db+11ee+a870+a0481c9e7d26	Mollusca	Bivalvia	Nuculida	Nuculidae	Ennucula	tenuis	Ennucula tenuis	4	0.0103
RIV_20m_R2	13	03c9c7da/fcb7/11ee/955d/a0481c9e7d26	c82dffa9+31db+11ee+a870+a0481c9e7d26	Mollusca	Scaphopoda					Scaphopoda	1	0.0476
RIV_20m_R2	14	ac68a5c2/f5a6/11ee/a89a/a0481c9e7d26	c82dffa9+31db+11ee+a870+a0481c9e7d26	Segments						Segments		0.0194
RIV_60m_R1	1	e1b77c08/f673/11ee/a44d/a0481c9e7d26	de156356+31db+11ee+a870+a0481c9e7d26	Annelida	Polychaeta	Eunicida	Lumbrineridae	Lumbrineris	mixochaeta	Lumbrineris mixochaeta	8	0.7103
RIV_60m_R1	2	ea012f58/f673/11ee/a44d/a0481c9e7d26	de156356+31db+11ee+a870+a0481c9e7d26	Annelida	Polychaeta	Phyllodocida	Goniadidae			Goniadidae	1	0.0032
RIV_60m_R1	3	ea012f58/f673/11ee/a44d/a0481c9e7d26	de156356+31db+11ee+a870+a0481c9e7d26	Annelida	Polychaeta	Phyllodocida	Phyllodocidae			Phyllodocidae	3	0.0027
RIV_60m_R1	4	f18d0d96/f673/11ee/a44d/a0481c9e7d26	de156356+31db+11ee+a870+a0481c9e7d26	Annelida	Polychaeta	Phyllodocida	Polynoidae			Polynoidae	1	0.1463
RIV_60m_R1	5	579542a6/fbf7/11ee/a2ac/a0481c9e7d26	de156356+31db+11ee+a870+a0481c9e7d26	Annelida	Polychaeta	Spionida	Spionidae			Spionidae	1	0.0868
RIV_60m_R1	6	e1b77c08/f673/11ee/a44d/a0481c9e7d26	de156356+31db+11ee+a870+a0481c9e7d26	Annelida	Polychaeta	Terebellida	Ampharetidae			Ampharetidae	3	0.0186
RIV_60m_R1	7	f51857a4/f673/11ee/a44d/a0481c9e7d26	de156356+31db+11ee+a870+a0481c9e7d26	Annelida	Polychaeta	Terebellida	Cirratulidae			Cirratulidae	22	0.0631
RIV_60m_R1	8	f890207e/f673/11ee/a44d/a0481c9e7d26	de156356+31db+11ee+a870+a0481c9e7d26	Mollusca	Bivalvia	Carditida	Astartidae	Tridonta	elliptica	Tridonta elliptica	1	0.0031
RIV_60m_R1	9	fcf25650/f673/11ee/a44d/a0481c9e7d26	de156356+31db+11ee+a870+a0481c9e7d26	Mollusca	Bivalvia	Lucinida	Thyasiridae	Axinopsida	orbiculata	Axinopsida orbiculata	21	0.2763
RIV_60m_R1	10	fcf25650/f673/11ee/a44d/a0481c9e7d26	de156356+31db+11ee+a870+a0481c9e7d26	Mollusca	Bivalvia	Lucinida	Thyasiridae	Mendicula	ferruginosa	Mendicula ferruginosa	3	0.0075
RIV_60m_R1	11	00f8fdd0/f674/11ee/a44d/a0481c9e7d26	de156356+31db+11ee+a870+a0481c9e7d26	Mollusca	Bivalvia	Lucinida	Thyasiridae	Thyasira	gouldi	Thyasira gouldi	5	0.0916
RIV_60m_R1	12	161bdbc4/f674/11ee/a44d/a0481c9e7d26	de156356+31db+11ee+a870+a0481c9e7d26	Mollusca	Bivalvia	Nuculanida	Yoldiidae	Yoldiella	frigida	Yoldiella frigida	10	0.0795
RIV_60m_R1	13	161bdbc4/f674/11ee/a44d/a0481c9e7d26	de156356+31db+11ee+a870+a0481c9e7d26	Mollusca	Bivalvia	Nuculanida	Yoldiidae	Yoldiella	lenticula	Yoldiella lenticula	1	0.0196
RIV_60m_R1	14	1d4879f2/f674/11ee/a44d/a0481c9e7d26	de156356+31db+11ee+a870+a0481c9e7d26	Mollusca	Bivalvia	Nuculanida	Yoldiidae	Yoldiella	lucida	Yoldiella lucida	2	0.0007
RIV_60m_R1	15	1d4879f2/f674/11ee/a44d/a0481c9e7d26	de156356+31db+11ee+a870+a0481c9e7d26	Mollusca	Bivalvia	Nuculanida	Yoldiidae	Yoldiella	solidula	Yoldiella solidula	98	0.3248
RIV_60m_R1	16	0e90039e/f674/11ee/a44d/a0481c9e7d26	de156356+31db+11ee+a870+a0481c9e7d26	Mollusca	Bivalvia	Nuculida	Nuculidae	Ennucula	tenuis	Ennucula tenuis	75	1.9813
RIV_60m_R1	17	0a8d0760/f674/11ee/a44d/a0481c9e7d26	de156356+31db+11ee+a870+a0481c9e7d26	Mollusca	Bivalvia	Nuculida	Nuculidae	Nuculana	pernula	Nuculana pernula	3	0.0168
RIV_60m_R1	18	26ba5578/f674/11ee/a44d/a0481c9e7d26	de156356+31db+11ee+a870+a0481c9e7d26	Mollusca	Caudofoveata	Chaetodermatida	Chaetodermatidae	Chaetoderma	nitidulum	Chaetoderma nitidulum	1	0.012
RIV_60m_R1	19	26ba5578/f674/11ee/a44d/a0481c9e7d26	de156356+31db+11ee+a870+a0481c9e7d26	Priapulida		Priapulomorpha	Priapulidae	Priapulus	caudatus	Priapulus caudatus	1	2.4211
RIV_60m_R1	20	3085568e/f674/11ee/a44d/a0481c9e7d26	de156356+31db+11ee+a870+a0481c9e7d26	Segments						Segments		0.2179
RIV_60m_R2	1	60979f16/f73d/11ee/a5cc/a0481c9e7d26	de156356+31db+11ee+a870+a0481c9e7d26	Annelida	Polychaeta	Eunicida	Lumbrineridae	Lumbrineris	mixochaeta	Lumbrineris mixochaeta	3	0.0035
RIV_60m_R2	2	64032f1c/f73d/11ee/a5cc/a0481c9e7d26	de156356+31db+11ee+a870+a0481c9e7d26	Annelida	Polychaeta	Phyllodocida	Goniadidae			Goniadidae	1	0.0042
RIV_60m_R2	3	60979f16/f73d/11ee/a5cc/a0481c9e7d26	de156356+31db+11ee+a870+a0481c9e7d26	Annelida	Polychaeta	Phyllodocida	Phyllodocidae			Phyllodocidae	1	0.006
RIV_60m_R2	4	6be0d720/f73d/11ee/a5cc/a0481c9e7d26	de156356+31db+11ee+a870+a0481c9e7d26	Annelida	Polychaeta	Phyllodocida	Polynoidae			Polynoidae	2	0.0183
RIV_60m_R2	5	5ce38312/f73d/11ee/a5cc/a0481c9e7d26	de156356+31db+11ee+a870+a0481c9e7d26	Annelida	Polychaeta	Terebellida	Ampharetidae			Ampharetidae	2	0.0406
RIV_60m_R2	6	6be0d720/f73d/11ee/a5cc/a0481c9e7d26	de156356+31db+11ee+a870+a0481c9e7d26	Annelida	Polychaeta	Terebellida	Cirratulidae			Cirratulidae	7	0.0072
RIV_60m_R2	7	74fc02c6/f73d/11ee/a5cc/a0481c9e7d26	de156356+31db+11ee+a870+a0481c9e7d26	Arthropoda	Malacostraca	Decapoda	Paguridae	Pagurus		Pagurus sp.	1	0.0318
RIV_60m_R2	8	74fc02c6/f73d/11ee/a5cc/a0481c9e7d26	de156356+31db+11ee+a870+a0481c9e7d26	Mollusca	Bivalvia	Lucinida	Thyasiridae	Axinopsida	orbiculata	Axinopsida orbiculata	6	0.0512
RIV_60m_R2	9	7e704650/f73d/11ee/a5cc/a0481c9e7d26	de156356+31db+11ee+a870+a0481c9e7d26	Mollusca	Bivalvia	Lucinida	Thyasiridae	Thyasira	gouldi	Thyasira gouldi	8	0.1427
RIV_60m_R2	10	81ef6072/f73d/11ee/a5cc/a0481c9e7d26	de156356+31db+11ee+a870+a0481c9e7d26	Mollusca	Bivalvia	Nuculanida	Yoldiidae	Yoldiella	frigida	Yoldiella frigida	2	0.0199
RIV_60m_R2	11	892f7fca/f73d/11ee/a5cc/a0481c9e7d26	de156356+31db+11ee+a870+a0481c9e7d26	Mollusca	Bivalvia	Nuculanida	Yoldiidae	Yoldiella	propinqua	Yoldiella propinqua	34	0.0473
RIV_60m_R2	12	8cb99554/f73d/11ee/a5cc/a0481c9e7d26	de156356+31db+11ee+a870+a0481c9e7d26	Mollusca	Bivalvia	Nuculanida	Yoldiidae	Yoldiella	solidula	Yoldiella solidula	45	0.1842
RIV_60m_R2	13	7e704650/f73d/11ee/a5cc/a0481c9e7d26	de156356+31db+11ee+a870+a0481c9e7d26	Mollusca	Bivalvia	Nuculida	Nuculidae	Ennucula	tenuis	Ennucula tenuis	74	1.4983
RIV_60m_R2	14	8cb99554/f73d/11ee/a5cc/a0481c9e7d26	de156356+31db+11ee+a870+a0481c9e7d26	Nemertea						Nemertea	1	0.139
RIV_60m_R2	15	927f3304/f73d/11ee/a5cc/a0481c9e7d26	de156356+31db+11ee+a870+a0481c9e7d26	Segments						Segments		0.0421
